# Supplementary material for: Non-pharmacological interventions for the prevention of hypertension in low-income and middle-income countries: protocol for a systematic review and meta-analysis
Source: PubMed Central journal article supplement — BMJ Open. 2018 May 24;8(5):e020724. doi: 10.1136/bmjopen-2017-020724 (PMC5988114; doi:10.1136/bmjopen-2017-020724), 2018-05-24
Supplement: bmjopen-2017-020724.draft_revisions.pdf [file bmjopen-2017-020724.draft_revisions.pdf]

# BMJ Open

BMJ Open is committed to open peer review. As part of this commitment we make the peer review history of every article we publish publicly available.

When an article is published we post the peer reviewers' comments and the authors' responses online. We also post the versions of the paper that were used during peer review. These are the versions that the peer review comments apply to.

The versions of the paper that follow are the versions that were submitted during the peer review process. They are not the versions of record or the final published versions. They should not be cited or distributed as the published version of this manuscript.

BMJ Open is an open access journal and the full, final, typeset and author-corrected version of record of the manuscript is available on our site with no access controls, subscription charges or pay-per-view fees (<http://bmjopen.bmj.com>).

If you have any questions on BMJ Open's open peer review process please email [info.bmjopen@bmj.com](mailto:info.bmjopen@bmj.com)

# BMJ Open

## Non pharmacological interventions for prevention of hypertension in Low and Middle Income Countries: Protocol for a systematic review and meta-analysis

|                               |                                                                                                                                                                                                                                                                                                                                                                                                                                                                                                                                                                                                                                                                                                                                                                                                                                                                                                                                                                                                                                                                                                                                     |
|-------------------------------|-------------------------------------------------------------------------------------------------------------------------------------------------------------------------------------------------------------------------------------------------------------------------------------------------------------------------------------------------------------------------------------------------------------------------------------------------------------------------------------------------------------------------------------------------------------------------------------------------------------------------------------------------------------------------------------------------------------------------------------------------------------------------------------------------------------------------------------------------------------------------------------------------------------------------------------------------------------------------------------------------------------------------------------------------------------------------------------------------------------------------------------|
| Journal:                      | <i>BMJ Open</i>                                                                                                                                                                                                                                                                                                                                                                                                                                                                                                                                                                                                                                                                                                                                                                                                                                                                                                                                                                                                                                                                                                                     |
| Manuscript ID                 | bmjopen-2017-020724                                                                                                                                                                                                                                                                                                                                                                                                                                                                                                                                                                                                                                                                                                                                                                                                                                                                                                                                                                                                                                                                                                                 |
| Article Type:                 | Protocol                                                                                                                                                                                                                                                                                                                                                                                                                                                                                                                                                                                                                                                                                                                                                                                                                                                                                                                                                                                                                                                                                                                            |
| Date Submitted by the Author: | 21-Nov-2017                                                                                                                                                                                                                                                                                                                                                                                                                                                                                                                                                                                                                                                                                                                                                                                                                                                                                                                                                                                                                                                                                                                         |
| Complete List of Authors:     | Rahman, K M Saif Ur; International Centre for Diarrhoeal Disease Research, Health Systems and Population Studies Division (HSPSD)<br>Hasan, Md.; International Centre for Diarrhoeal Disease Research, Health Systems and Population Studies Division (HSPSD)<br>Hossain, Shahed; International Centre for Diarrhoeal Disease Research, Health Systems and Population Studies Division (HSPSD)<br>Shafique, Sohana; International Centre for Diarrhoeal Disease Research, Health Systems and Population Studies Division (HSPSD)<br>Khalequzzaman, Md. ; Bangabandhu Sheikh Mujib Medical University, Department of Public Health & Informatics<br>Haseen, Fariha; Bangabandhu Sheikh Mujib Medical University, Department of Public Health and Informatics<br>Rahman, Aminur ; International Centre for Diarrhoeal Disease Research, Health Systems and Population Studies Division (HSPSD)<br>Anwar, Iqbal; International Centre for Diarrhoeal Disease Research, Health Systems and population studies division (HSPSD)<br>Islam, Syed; Bangabandhu Sheikh Mujib Medical University, Department of Public Health and Informatics |
| Keywords:                     | Intervention, Prevention, Hypertension < CARDIOLOGY, Non pharmacological, Systematic review, LMIC                                                                                                                                                                                                                                                                                                                                                                                                                                                                                                                                                                                                                                                                                                                                                                                                                                                                                                                                                                                                                                   |
|                               |                                                                                                                                                                                                                                                                                                                                                                                                                                                                                                                                                                                                                                                                                                                                                                                                                                                                                                                                                                                                                                                                                                                                     |

SCHOLARONE™  
Manuscripts

**Title:** Non pharmacological interventions for prevention of hypertension in Low and Middle Income Countries: Protocol for a systematic review and meta-analysis

**Authors' name:** K M Saif-Ur-Rahman<sup>1,3</sup>, Md Hasan<sup>1,3</sup>, Shahed Hossain<sup>1</sup>, Sohana Shafique<sup>1</sup>, Md. Khalequzzaman<sup>2,3</sup>, Fariha Haseen<sup>2,3</sup>, Aminur Rahman<sup>1</sup>, Iqbal Anwar<sup>1</sup>, Shariful Islam<sup>2,3</sup>

**Affiliations:** 1 Health Systems and Population Studies Division, icddr,b, Dhaka, Bangladesh  
2 Department of Public Health and Informatics, Bangabandhu Sheikh Mujib Medical University (BSMMU), Dhaka, Bangladesh  
3 Systematic Review Centre (SRC), Bangabandhu Sheikh Mujib Medical University (BSMMU), Dhaka, Bangladesh

**Mail addresses:** [su.rahman@icddr.org](mailto:su.rahman@icddr.org) ; [hasan.md@icddr.org](mailto:hasan.md@icddr.org) ; [shahed@icddr.org](mailto:shahed@icddr.org) ; [sohana.shafique@icddr.org](mailto:sohana.shafique@icddr.org) ; [romenraihan@yahoo.com](mailto:romenraihan@yahoo.com) ; [farhaseen3@gmail.com](mailto:farhaseen3@gmail.com) ; [draminur@icddr.org](mailto:draminur@icddr.org) ; [iqbal@icddr.org](mailto:iqbal@icddr.org) ; [islam.sharif@gmail.com](mailto:islam.sharif@gmail.com)

**Corresponding author:** K M Saif-Ur-Rahman, icddr,b ,  
Universal Health Coverage, Health Systems and Population Studies  
Division (HSPSD)  
68, Shahid Tajuddin Ahmed Sarani, Mohakali, Dhaka 1212,  
Bangladesh  
mail: [su.rahman@icddr.org](mailto:su.rahman@icddr.org)  
Phone: +8801717043239

**Word Count:** 2030

1  
2  
3 **32 ABSTRACT:**  
4  
5 **33**

6 **34 Introduction:** In current days, hypertension has become one of the major public health problems  
7  
8 **35** in both developed and developing world and is responsible for death due to heart diseases and  
9  
10 **36** stroke. Increasing trend in prevalence of hypertension in low and middle income countries and  
11  
12 **37** it's catastrophic consequences have made the phenomena important to continue to investigate  
13  
14 **38** interventions for prevention. There are different dietary and life style related approaches for  
15  
16 **39** prevention of hypertension. Aim of this review is to explore the available non pharmacological  
17  
18 **40** approaches for prevention of hypertension in low and middle income countries.

19 **41 Methods and analysis:** Eight electronic databases will be searched for the period between 1990  
20  
21 **42** and 2016 to identify relevant studies and screened by two reviewers independently. Articles will  
22  
23 **43** be included for full text extraction applying definitive inclusion and exclusion criteria.  
24  
25 **44** Appropriate critical appraisal tools including Cochrane Handbook for Systematic Reviews of  
26  
27 **45** Interventions. Risk of bias will be judged. Disagreement between the independent reviewers will  
28  
29 **46** be resolved by a third reviewer. Narrative synthesis of the findings will be provided along with  
30  
31 **47** summaries of intervention effect. A meta analysis will be conducted using a random effect model  
32  
33 **48** where applicable. Heterogeneity between the studies will be assessed and sensitivity analysis  
34  
35 **49** will be conducted based on study quality.

36 **50 Ethics and dissemination:** This systematic review protocol is registered with International  
37  
38 **51** Prospective Register of Systematic Reviews (PROSPERO) CRD42017055423. Approval from  
39  
40 **52** institutional review board has been taken for this review. Findings will be summarized in a single  
41  
42 **53** manuscript.

43  
44 **54** This review is an attempt to explore the available non pharmacological approaches for  
45  
46 **55** prevention of hypertension in low and middle income countries. Findings from the review will  
47  
48 **56** highlight effective measures for prevention of hypertension and will guide the policy makers to  
49  
50 **57** identify appropriate approach.

51 **58**

52 **59**

53 **60**

54 **61**

55 **62**

1  
2  
3  
4  
5  
6  
7  
8  
9  
10  
11  
12  
13  
14  
15  
16  
17  
18  
19  
20  
21  
22  
23  
24  
25  
26  
27  
28  
29  
30  
31  
32  
33  
34  
35  
36  
37  
38  
39  
40  
41  
42  
43  
44  
45  
46  
47  
48  
49  
50  
51  
52  
53  
54  
55  
56  
57  
58  
59  
60

**Key Words:** Intervention, Prevention, Hypertension, Non pharmacological, Systematic review, LMIC

For peer review only

## 94 INTRODUCTION

95  
96 In current days, hypertension has become one of the major public health problems in both  
97 developed and developing world. According to the World Health Organization (WHO), global  
98 prevalence of hypertension (defined as systolic and/or diastolic blood pressure equal to or above  
99 140/90 mmHg[1]) in adults aged 18 years and over was around 22% in 2014[2]. High blood  
100 pressure has been estimated to be increased to 29% by the year 2025[3]. Hypertension is the  
101 leading cause of death due to heart disease (45%) and stroke (51%)[4]. Recent trend of  
102 epidemiological transition is reflected with increased prevalence of hypertension in developing  
103 countries whereas a decreasing tendency in the developed world[5]. In 2010, the prevalence of  
104 adult hypertensive population was 31.1%, among which high-income countries were less  
105 prevalent (28.5%) than in low- and middle-income countries 31.5%. Between the last decades  
106 (from 2000 to 2010), the age-standardized prevalence of hypertension increased by 7.7% in low-  
107 and middle-income countries and decreased by 2.6% in high-income countries[6]. In 2015, more  
108 than half of the global disability adjusted life years (DALYs) were related to systolic blood  
109 pressure in countries like China, India, Russia, Indonesia, and the United States[7]. A recent  
110 systematic review describes that the pooled estimate of the overall prevalence of hypertension in  
111 Low and Middle income countries was 32.3%[8]. Overall prevalence for hypertension in India  
112 was 29.8% according to a systematic review though there was significant difference in  
113 hypertension prevalence between rural and urban areas[9]. Similar results have been found in  
114 Bangladeshi population based survey which shows overall age-standardized prevalence of pre-  
115 hypertension and hypertension were 27.1% and 24.4% respectively[10]. In Pakistan, the overall  
116 prevalence of hypertension was 26% among the low income community with an increased  
117 proportion among the males[11]. Highly increasing prevalence of hypertension leads to the high  
118 morbidity and mortality which has made the phenomena an important public health issue and  
119 therefore, it is important to continue to investigate interventions that can prevent hypertension.  
120 There are different dietary and life style related approaches for prevention of hypertension[12].  
121 Specific interventions with certain supplementations like increased calcium intake has been  
122 proved as effective which reduces both systolic and diastolic blood pressure in normotensive  
123 people, suggesting a role in the prevention of hypertension[13]. Other than general exercise,  
124 yoga[14] and tai chai[15] also successfully prevent and control hypertension which is evident.

1  
2  
3 125 Even some medications have been tested as a preventive medication among prehypertensive  
4 126 persons as means of prevention in randomized controlled trials [16].

5  
6 127 Prevention of hypertension can minimize the fatal morbid conditions and consequences of  
7 128 cardiovascular events. Despite of different approaches, an effective preventive strategy or  
8 129 intervention can help the public health experts and policy makers to plan properly for addressing  
9 130 the increasing burden.  
10  
11  
12  
13  
14 131

## 15 132 **OBJECTIVE:**

16 133  
17  
18 134 This review is an attempt to explore the available non pharmacological approaches including  
19 135 lifestyle modification, exercise, dietary supplementation and restriction etc for prevention of  
20 136 hypertension in low and middle income countries which will find the effective measures for  
21 137 prevention of hypertension as well.  
22  
23  
24  
25  
26 138

## 27 139 **METHODS:**

### 30 141 **PROTOCOL**

31 142 This is a protocol for systematic review and meta analysis which has been developed addressing  
32 143 the Preferred Reporting Items for Systematic Reviews and Meta-Analysis Protocols (PRISMA-  
33 144 P) guidelines for reporting systematic reviews evaluating health care interventions[17 18]. A  
34 145 PRISMA-P checklist for this protocol is attached (Additional file 1).  
35  
36  
37  
38  
39 146

### 41 147 **ELIGIBILITY CRITERIA**

42 148 Studies will be selected according to the criteria outlined below.  
43  
44  
45 149

### 46 150 **PARTICIPANTS**

47 151 Included studies will be on normotensive (Systolic BP 120-139 mm hg and diastolic BP 80-89  
48 152 mm hg)[19] adults of low and middle income countries (LMIC's) as defined by the World  
49 153 Bank[20].  
50  
51  
52  
53 154  
54  
55 155

## 156 INTERVENTIONS

157  
158 Studies assessing the effect of nonpharmacological interventions for the prevention of  
159 hypertension among normotensive adult population will be considered for inclusion.  
160 Interventions will be including life style modification, dietary restriction, non pharmacological  
161 diet supplementation, exercise and any combination of the above mentioned interventions.

## 163 COMPARATORS

164 A comparison will be made with non pharmacological interventions versus no intervention.

## 166 OUTCOMES

167 Primary outcomes

168 Hypertension, Systolic and diastolic blood pressure

169 Secondary outcomes

170 Any adverse event; Cardiovascular events; Myocardial infarction; Stroke; Kidney stone  
171 formation; Iron deficiency anaemia; mortality; Sudden death

## 173 SETTING

174 There will be no restrictions by type of setting such as hospital based or community setting.

## 176 STUDY DESIGNS

177 We will include randomized controlled trials (RCTs) (including cluster RCTs) to assess the  
178 beneficial effect of the interventions. Non-randomized studies including controlled before-and-  
179 after studies, prospective comparative cohort studies, case-control studies and cross-sectional  
180 studies will be excluded.

## 182 INFORMATION SOURCES

183 Following electronic bibliographic databases will be searched systematically using a  
184 comprehensive search strategy. The databases are: MEDLINE through pubmed, Embase, The  
185 Cochrane Library (Cochrane Central Register of Controlled Trials (CENTRAL), Web of  
186 Science, Scopus, Clinical Trials. gov, EBSCO and WICTRP (International Clinical Trials



1  
2  
3 187 Registry Platform). The search strategy will include terms relating to or describing the  
4  
5 188 population, intervention and outcome. The terms will be combined with the Cochrane  
6  
7 189 MEDLINE filter for controlled trials of interventions.  
8  
9

## 10 191 **SEARCH STRATEGY**

11  
12 192 A comprehensive search strategy will be developed for MEDLINE. The search terms will be  
13  
14 193 adapted for other bibliographic databases in combination with database-specific filters for  
15  
16 194 controlled trials, where these are available. Key search terms for population, intervention,  
17  
18 195 comparison and outcome are as follow:  
19  
20

21 197 **Table 1: Key terms used for developing comprehensive search strategy**  
22  
23 198

| Population (P)                | Intervention (I)                                                                                                                                                       | Outcome (O)                      | Filter                                     |
|-------------------------------|------------------------------------------------------------------------------------------------------------------------------------------------------------------------|----------------------------------|--------------------------------------------|
| LMICs<br>“Developing Country” | Exercise<br>“Physical activity”<br>“Weight Loss”<br>“Sodium restriction”<br>“Dietary potassium<br>“Calcium supplementation”<br>“Fish oil supplementation”<br>Lifestyle | Hypertension<br>“Blood Pressure” | “Randomized<br>Controlled<br>Trials” (RCT) |

24  
25  
26  
27  
28  
29  
30  
31  
32  
33  
34  
35  
36  
37  
38  
39  
40  
41 199  
42 200 Only English language literature will be searched. Studies published between January 1990 and  
43  
44 201 the date the searches are run will be sought. The searches will be re-run just before the final  
45  
46 202 analyses and further studies retrieved for inclusion. Comprehensive search strategy prepared for  
47  
48 203 pubmed is provided in Table 2.  
49  
50

51 205 **Table 2: Search strategy: PubMed format**  
52

|   |                                                                               |
|---|-------------------------------------------------------------------------------|
| 1 | LMIC's*                                                                       |
| 2 | Exercise [MeSH Terms] OR “Physical Exercise” [tw] OR “Physical activity” [tw] |

- 1  
2  
3  
4  
5  
6  
7  
8  
9  
10  
11  
12  
13  
14  
15  
16  
17  
18  
19  
20  
21  
22  
23  
24  
25  
26  
27  
28  
29  
30  
31  
32  
33  
34  
35  
36  
37  
38  
39  
40  
41  
42  
43  
44  
45  
46  
47  
48  
49  
50  
51  
52  
53  
54  
55  
56  
57  
58  
59  
60
- 
- 3 ("Weight Loss/classification"[Mesh] OR "Weight Loss/complications"[Mesh] OR "Weight Loss/diagnosis"[Mesh] OR "Weight Loss/diet therapy"[Mesh] OR "Weight Loss/drug effects"[Mesh] OR "Weight Loss/drug therapy"[Mesh] OR "Weight Loss/epidemiology"[Mesh] OR "Weight Loss/etiology"[Mesh] OR "Weight Loss/genetics"[Mesh] OR "Weight Loss/metabolism"[Mesh] OR "Weight Loss/mortality"[Mesh] OR "Weight Loss/prevention and control"[Mesh] OR "Weight Loss/rehabilitation"[Mesh] OR "Weight Loss/statistics and numerical data"[Mesh] )
- 
- 4 Exercise therapy [mesh] OR Exercise test [mesh] OR Exercise Movement Techniques [mesh]
- 
- 5 "weight loss" [tw] OR weight reduction program [MeSH Terms] OR "weight reduction" [tw] OR losing weight [tw]
- 
- 6 "Sodium restriction" [tw] OR Dietary potassium [MeSH Terms] OR "Dietary potassium" [tw] OR "Calcium supplementation" OR "Fish oil supplementation" [tw]
- 
- 7 Salt Restrict\*[tiab] OR low Sodium\*[tiab] OR low salt\*[tiab] OR Potassium, Diet\* [tw]
- 
- 8 Magnesium [tw] OR Calcium [tw]
- 
- 9 "Salt intake" [tw] OR Sodium Chloride, Dietary [MeSH Term] OR "Dietary salt" [tw] OR "Dietary Salt intake" [tw] OR "Dietary Salt restriction" [tw]
- 
- 10 Garlic [MeSH Terms] OR Garlic [tw]
- 
- 11 Smoking Cessation [MeSH Term] OR "Smoking Cessation" [tw] OR Tobacco Use Cessation\*[tw]
- 
- 12 decreased [tw] AND ("alcohol drinking"[MeSH Terms] OR ("alcohol"[tw] AND "drinking"[tw]) OR "alcohol drinking"[tw] OR ("alcohol"[tw] AND "intake"[tw]) OR "alcohol intake"[tw])
- 
- 13 Alcohol Drink\*[tw] OR Alcohol consum\*[tw] OR Drinking Alcohol\*[tw] OR Alcoholi\*[tw] OR non pharmacol\*[tw]
- 
- 14 life style\*[tw] OR lifestyl\*[tw] OR diet therapy [mesh] OR fat Restrict\*[tiab] OR low fat\*[tiab] OR Carbohydrate Restrict\*[tiab] OR low carb\*[tiab] OR Caloric Restrict\*[tw] OR Food, Formulated [tw] OR Formulated Food\*[tw] OR diet [tw] OR dietary [tw]
- 
- 15 Disease Management\*[tw] OR kinesiotherap\*[tw] OR Physical Endurance [mesh] OR Anaerobic\*[tiab] OR aerobic\*[tiab] OR Resistance Training\*[tiab] OR Motor activit\*[tw] OR Physical Activit\*[tiab] OR Locomotor Activit\*[tiab]
- 
- 16 Social support\*[tw] OR Social Network\*[tiab] OR relaxation therap\* [tw] OR tai-ji [tw] OR yoga [tw]
- 
- 17 **OR/ 2-16**
- 
- 18 "Hypertension/classification"[Majr] OR "Hypertension/complications"[Majr] OR "Hypertension/diet therapy"[Majr] OR "Hypertension/drug effects"[Majr] OR "Blood Pressure/classification"[Mesh] OR "Blood Pressure/complications"[Mesh] OR "Blood Pressure/diagnosis"[Mesh] OR "Blood Pressure/drug effects"[Mesh] OR "Blood Pressure/etiology"[Mesh] OR "Blood Pressure/genetics"[Mesh] OR "Blood Pressure/metabolism"[Mesh] OR "Blood Pressure/methods"[Mesh] OR "Blood Pressure/statistics and numerical data"[Mesh] OR "Blood Pressure/therapy"[Mesh] OR "Hypertension/drug therapy"[Majr] OR "Hypertension/epidemiology"[Majr] OR "Hypertension/etiology"[Majr] OR "Hypertension/genetics"[Majr] OR "Hypertension/metabolism"[Majr] OR "Hypertension/mortality"[Majr]
-

- 
- 19 "Hypertension/prevention and control"[Majr] OR "Hypertension/rehabilitation"[Majr] OR "Hypertension/therapy"[Majr] OR "Blood Pressure/classification"[Mesh] OR "Blood Pressure/complications"[Mesh] OR "Blood Pressure/diagnosis"[Mesh] OR "Blood Pressure/drug effects"[Mesh] OR "high blood pressure" [tw] OR "Blood pressure" [tw] OR bloodpressure [tw] OR ("Systole/drug effects"[Majr] OR "Systole/etiology"[Majr] OR "Systole/genetics"[Majr]) OR "Blood Pressure/etiology"[Mesh] OR "Blood Pressure/genetics"[Mesh] OR "Blood Pressure/metabolism"[Mesh] OR "Blood Pressure/methods"[Mesh] OR "Blood Pressure/statistics and numerical data"[Mesh] OR "Blood Pressure/therapy"[Mesh] OR "high blood pressure" [tw] OR "Blood pressure" [tw] OR bloodpressure [tw] OR ("Systole/drug effects"[Majr] OR "Systole/etiology"[Majr] OR "Systole/genetics"[Majr]) OR ("Diastole/drug effects"[Mesh] OR "Diastole/etiology"[Mesh] OR "Diastole/genetics"[Mesh]) OR ((arterial OR diastolic OR systolic) AND pressure) OR Hypertension [tw] OR "Blood Pressure" [tw]
- 
- 20 **OR/18-19**
- 
- 21 Randomized controlled trial [tiab] OR controlled clinical trial [tiab] OR randomized [tiab] OR placebo [tiab] OR randomization [tiab] OR randomization [tiab] OR drug therapy [tiab] OR randomly [tiab] OR trial [tiab] OR groups [tiab]
- 
- 22 **#1 AND #17 AND #20 AND #21**
- 
- 23 animals [mh] NOT humans [mh]
- 
- 24 **#22 NOT #23**
- 
- 25 Restrict #24 to year=1990 and up to date
- 
- 26 Restrict #25 to English language
- 
- 27 Restrict #26 to Age 18+ years
- 

206

207 Search terms and search strategy for LMICs are provided in Additional file 2.

208

## 209 STUDY RECORDS

210

## 211 DATA MANAGEMENT

212 Reference management software EndNote will be used to organize articles retrieved from the  
 213 comprehensive literature search. Search results from different electronic databases will be  
 214 combined and uploaded in a single EndNote library. Duplicate articles will be checked and  
 215 removed.

216 Remaining literature search results will be uploaded to EPPI reviewer, a software with facilities  
 217 of citation screening and supports collaboration between reviewers. Citation abstracts and full  
 218 text articles will be uploaded to the EPPI reviewer software.

219

## 220 **SELECTION PROCESS**

221 Screening of title and abstract of retrieved articles will be conducted by two reviewers  
222 independently to identify the included studies. The screening of retrieved outcome of  
223 comprehensive search strategy will be done using the EPPI reviewer software. After inclusion  
224 for full text review, eligible studies will be assessed independently for final inclusion. Any  
225 disagreement between reviewers over the decision of inclusion will be resolved through  
226 discussion with a third reviewer. Reasons for exclusion will be recorded. We will report multiple  
227 publications from the same study. Summary of included and excluded studies will be  
228 demonstrated using the Preferred Reporting Items for Systematic Reviews and Meta-analyses  
229 (PRISMA) flow-diagram[21].

## 231 **DATA EXTRACTION**

232 Quality assessment of included studies will be conducted and data will be extracted using a  
233 standardized form. We will extract information including study population, study setting,  
234 baseline demographics characteristics of study participants, study methodology, details regarding  
235 the intervention and control groups, enrollment and attrition rates, outcomes measurement, and  
236 information for assessing of the risk of bias. Data extraction will be conducted by two reviewers  
237 independently. Any dispute will be resolved through discussion with a third reviewer.

## 239 **RISK OF BIAS ASSESSMENT**

240 Two reviewers will assess the risk of bias independently following guidelines from Cochrane  
241 assessment of risk of bias for randomized controlled trials[22]. According to the guideline,  
242 specific six domains including selection bias, performance bias, detection bias, attrition bias,  
243 reporting bias and other bias are considered. Reviewers will provide their judgments to make  
244 comments on whether studies are at high risk of bias. For assessing selection bias, allocation  
245 concealment and random sequence generation will be considered. Performance and detection  
246 bias will be assessed through assessment of blinding at the level of participants, implementers  
247 and outcome assessors. Loose to follow up will be considered to assess attrition bias. Selective  
248 reporting and selective presentation of outcome will also be considered. There will be search for  
249 any other potential bias. Any disagreements between the review authors while assessing the risk

250 of bias will be resolved by discussion and if necessary, a third reviewer will opine to resolve the  
251 issue.

252

## 253 **ASSESSMENT OF THE BODY OF EVIDENCE—THE GRADE APPROACH**

254 We will use the Grades of Recommendation, Assessment, Development and Evaluation  
255 (GRADE) approach for assessment of quality of evidence[23] which focuses on five domains  
256 including study limitations, imprecision, indirectness, effect consistency and publication bias.  
257 Considering these domains, the quality of the body of evidence will be assessed for specific  
258 outcomes. Assessing as high risk of bias, indirect and imprecise evidence will lead to downgrade  
259 the evidence by one or two level.

260

## 261 **STRATEGY FOR DATA SYNTHESIS**

262 A narrative synthesis of the findings from the included studies will be provided focusing the  
263 characteristics of target population, type of intervention and outcome. A summary of intervention  
264 effects for individual studies will be provided by calculating risk ratios or odds ratio or  
265 standardized mean differences for dichotomous and continuous outcomes respectively. Studies  
266 with the same interventions, comparators and outcome measure, will be pooled using a random-  
267 effects meta-analysis and 95% confidence intervals and two sided P values will be calculated for  
268 each outcome. Standard deviations will be adjusted for the design effect where the effects of  
269 clustering have not been taken into account,. Both the Chi-squared test and the I-squared statistic  
270 will be considered for measuring the heterogeneity of effect measures. I-squared value greater  
271 than 50% will be indicative of substantial heterogeneity. We will conduct sensitivity analyses  
272 based on study quality where applicable. We will also assess the included articles for potential  
273 publication bias.

274

## 275 **STRENGTH**

- 276 • Strong methodology
- 277 • Includes Randomized Controlled Trials only
- 278 • Assessment of risk of bias (ROB) following Cochrane guideline for assessing risk of bias

279

## 280 **LIMITATIONS**

- 1  
2  
3 281 • Includes articles written in English only  
4  
5 282

6  
7 283 **PUBLICATION PLAN**

8 284 This systematic review protocol is registered with International Prospective Register of  
9 Systematic Reviews (PROSPERO) CRD42017055423. Findings will be summarized in a single  
10 285 manuscript.  
11  
12 286  
13  
14 287

15 288 **TIMELINE**

16  
17 289 Review start date: 1<sup>st</sup> March 2017  
18  
19 290 Review finishing date: 28 February 2018  
20  
21 291 Reporting date: 28 February 2018  
22  
23

24 293 **ABBREVIATIONS**

25 294 BSMMU: Bangabandhu sheikh mujib medical university  
26  
27 295 DALYs: Disability adjusted life years  
28  
29 296 GRADE: Grades of Recommendation, Assessment, Development and Evaluation  
30  
31 297 LMICs: Low and middle income countries  
32  
33 298 MESH: Medical subject headings  
34  
35 299 PRISMA-P: Preferred reporting items for systematic reviews and meta-analysis protocols  
36 300 PROSPERO: International prospective register of systematic reviews  
37  
38 301 RCT: Randomized controlled trial WHO: World health organization  
39  
40 302

41 303 **DECLARATIONS**

42  
43 304

44  
45 305 **FUNDING**

46 306 This review has been conducted by the Systematic Review Centre (SRC) of Department of  
47 Public Health and Informatics at Bangabandhu Sheikh Mujib Medical University (BSMMU),  
48 307 Bangladesh which has been established with the support of SHARE (Strengthening Health  
49 Applying Research Evidence) project of icddr, funded by the European Union. icddr,  
50 308 acknowledges with gratitude the commitment of European Union (EU) to its research efforts.  
51  
52 309  
53  
54  
55  
56  
57  
58  
59  
60

1  
2  
3 311 icddr,b is also grateful to the Governments of Bangladesh, Canada, Sweden and the UK for  
4 312 providing core/unrestricted support.

5  
6  
7 313

#### 8 314 **AVAILABILITY OF DATA AND MATERIALS**

9  
10 315 The datasets generated and/or analyzed during the current review shall be available from the  
11 316 corresponding author on reasonable request.

12  
13  
14 317

#### 15 318 **AUTHORS' CONTRIBUTIONS**

16  
17 319 IA, SI, SH, SR and MH conceptualized the review in consultation with the co-reviewers. SR  
18 320 wrote the first draft of this protocol with substantial inputs from all authors. SR and MH will  
19 321 contribute to the literature search. Screening, collection and analysis of data for all the included  
20 322 interventions will be conducted by SR and MH with close consultation from SH, SS, SI, AR,  
21 323 MK, FH and IA. All authors will provide input, review and finalize the paper before  
22 324 dissemination. The corresponding author is the guarantor of this review. All authors read and  
23 325 approved the final manuscript.

24  
25  
26  
27  
28  
29 326

#### 30 327 **COMPETING INTERESTS**

31 328 The authors declare that they have no competing interests.

32  
33  
34 329

#### 35 330 **ETHICS APPROVAL AND CONSENT TO PARTICIPATE**

36 331 Approval for conducting this systematic review has been taken from the Institutional Review  
37 332 Board (IRB) of Bangabandhu Sheikh Mujib Medical University (BSMMU). No additional  
38 333 formal ethical assessment and no informed consent are required.

39  
40  
41  
42  
43 334

44  
45 335

#### 46 336 **AMENDMENTS**

47  
48 337 Any updates or amendments to this protocol will be described in a table including the date of  
49 338 each amendment, description of the change and rationale for the change. The PROSPERO  
50 339 register will remain updated with the protocol and amendments.

51  
52  
53 340

54  
55  
56 341



## Reference

1. James PA, Oparil S, Carter BL, et al. 2014 evidence-based guideline for the management of high blood pressure in adults: Report from the panel members appointed to the eighth joint national committee (jnc 8). *Jama* 2014;**311**(5):507-20 doi: 10.1001/jama.2013.284427[published Online First: Epub Date]].
2. World Health Organization W. Global status report on noncommunicable diseases 2014. 2014
3. Kearney PM, Whelton M, Reynolds K, et al. Global burden of hypertension: analysis of worldwide data. *The lancet* 2005;**365**(9455):217-23
4. (WHO) WHO. A global brief on hypertension: silent killer, global public health crisis. World 2016
5. Kearney PM, Whelton M, Reynolds K, et al. Worldwide prevalence of hypertension: a systematic review. *Journal of Hypertension* 2004;**22**(1):11-19
6. Mills KT, Bundy JD, Kelly TN, et al. Global Disparities of Hypertension Prevalence and Control Clinical Perspective. *Circulation* 2016;**134**(6):441-50
7. Forouzanfar MH, Liu P, Roth GA, et al. Global Burden of Hypertension and Systolic Blood Pressure of at Least 110 to 115 mm Hg, 1990-2015. *Jama* 2017;**317**(2):165-82 doi: 10.1001/jama.2016.19043[published Online First: Epub Date]].
8. Sarki AM, Nduka CU, Stranges S, et al. Prevalence of Hypertension in Low- and Middle-Income Countries: A Systematic Review and Meta-Analysis. *Medicine* 2015;**94**(50):e1959 doi: 10.1097/md.0000000000001959[published Online First: Epub Date]].
9. Anchala R, Kannuri NK, Pant H, et al. Hypertension in India: a systematic review and meta-analysis of prevalence, awareness, and control of hypertension. *Journal of hypertension* 2014;**32**(6):1170-77
10. Rahman MM, Gilmour S, Akter S, et al. Prevalence and control of hypertension in Bangladesh: a multilevel analysis of a nationwide population-based survey. *J Hypertens* 2015;**33**(3):465-72; discussion 72 doi: 10.1097/hjh.0000000000000421[published Online First: Epub Date]].
11. Safdar S, Omair A, Faisal U, et al. Prevalence of hypertension in a low income settlement of Karachi, Pakistan. *Prevalence* 2004
12. Appel LJ, Brands MW, Daniels SR, et al. Dietary approaches to prevent and treat hypertension: a scientific statement from the American Heart Association. *Hypertension (Dallas, Tex : 1979)* 2006;**47**(2):296-308 doi: 10.1161/01.hyp.0000202568.01167.b6[published Online First: Epub Date]].
13. Cormick G, Ciapponi A, Cafferata ML, et al. Calcium supplementation for prevention of primary hypertension. *The Cochrane database of systematic reviews* 2015(6):Cd010037 doi: 10.1002/14651858.CD010037.pub2[published Online First: Epub Date]].
14. Wang J, Xiong X, Liu W. Yoga for essential hypertension: a systematic review. *PloS one* 2013;**8**(10):e76357
15. Yeh GY, Wang C, Wayne PM, et al. The effect of tai chi exercise on blood pressure: a systematic review. *Preventive cardiology* 2008;**11**(2):82-89
16. Fuchs SC, Poli-de-Figueiredo CE, Figueiredo Neto JA, et al. Effectiveness of Chlorthalidone Plus Amiloride for the Prevention of Hypertension: The PREVER-Prevention Randomized Clinical Trial. *Journal of the American Heart Association* 2016;**5**(12) doi: 10.1161/jaha.116.004248[published Online First: Epub Date]].
17. Moher D, Shamseer L, Clarke M, et al. Preferred reporting items for systematic review and meta-analysis protocols (PRISMA-P) 2015 statement. *Systematic reviews* 2015;**4**(1):1
18. Shamseer L, Moher D, Clarke M, et al. Preferred reporting items for systematic review and meta-analysis protocols (PRISMA-P) 2015: elaboration and explanation. *Bmj* 2015;**349**:g7647
19. Gabb GM, Mangoni A, Anderson CS, et al. Guideline for the diagnosis and management of hypertension in adults—2016. *mortality* 2016;**3**:4
20. Bank W. "Country Groups," Data and Statistics, The World Bank. 2007



1  
2  
3 391 21. Moher D, Liberati A, Tetzlaff J, et al. Preferred reporting items for systematic reviews and meta-  
4 392 analyses: the PRISMA statement. PLoS med 2009;6(7):e1000097  
5 393 22. Higgins J GS. Cochrane Handbook for Systematic Reviews of Interventions, Version 5.1.0. . The  
6 394 Cochrane Collaboration 2011  
7 395 23. Schunemann H BJ, Guyatt G, Oxman AD. GRADE Handbook: handbook for grading the quality of  
8 396 evidence and the strength of recommendations using the GRADE approach. . 2013

9  
10 397  
11  
12  
13  
14  
15  
16  
17  
18  
19  
20  
21  
22  
23  
24  
25  
26  
27  
28  
29  
30  
31  
32  
33  
34  
35  
36  
37  
38  
39  
40  
41  
42  
43  
44  
45  
46  
47  
48  
49  
50  
51  
52  
53  
54  
55  
56  
57  
58  
59  
60

For peer review only

**PRISMA-P (Preferred Reporting Items for Systematic review and Meta-Analysis Protocols) 2015 checklist: recommended items to address in a systematic review protocol\***

| Section and topic                 | Item No | Checklist item                                                                                                                                                                                                                | Page # |
|-----------------------------------|---------|-------------------------------------------------------------------------------------------------------------------------------------------------------------------------------------------------------------------------------|--------|
| <b>ADMINISTRATIVE INFORMATION</b> |         |                                                                                                                                                                                                                               |        |
| Title:                            |         |                                                                                                                                                                                                                               |        |
| Identification                    | 1a      | Identify the report as a protocol of a systematic review                                                                                                                                                                      | 1      |
| Update                            | 1b      | If the protocol is for an update of a previous systematic review, identify as such                                                                                                                                            | N/A    |
| Registration                      | 2       | If registered, provide the name of the registry (such as PROSPERO) and registration number                                                                                                                                    | 12     |
| Authors:                          |         |                                                                                                                                                                                                                               |        |
| Contact                           | 3a      | Provide name, institutional affiliation, e-mail address of all protocol authors; provide physical mailing address of corresponding author                                                                                     | 1      |
| Contributions                     | 3b      | Describe contributions of protocol authors and identify the guarantor of the review                                                                                                                                           | 13     |
| Amendments                        | 4       | If the protocol represents an amendment of a previously completed or published protocol, identify as such and list changes; otherwise, state plan for documenting important protocol amendments                               | N/A    |
| Support:                          |         |                                                                                                                                                                                                                               |        |
| Sources                           | 5a      | Indicate sources of financial or other support for the review                                                                                                                                                                 | 12     |
| Sponsor                           | 5b      | Provide name for the review funder and/or sponsor                                                                                                                                                                             | 12     |
| Role of sponsor or funder         | 5c      | Describe roles of funder(s), sponsor(s), and/or institution(s), if any, in developing the protocol                                                                                                                            | 12     |
| <b>INTRODUCTION</b>               |         |                                                                                                                                                                                                                               |        |
| Rationale                         | 6       | Describe the rationale for the review in the context of what is already known                                                                                                                                                 | 4-5    |
| Objectives                        | 7       | Provide an explicit statement of the question(s) the review will address with reference to participants, interventions, comparators, and outcomes (PICO)                                                                      | 5-6    |
| <b>METHODS</b>                    |         |                                                                                                                                                                                                                               |        |
| Eligibility criteria              | 8       | Specify the study characteristics (such as PICO, study design, setting, time frame) and report characteristics (such as years considered, language, publication status) to be used as criteria for eligibility for the review | 6-7    |
| Information sources               | 9       | Describe all intended information sources (such as electronic databases, contact with study authors, trial registers or other grey literature sources) with planned dates of coverage                                         | 6-7    |
| Search strategy                   | 10      | Present draft of search strategy to be used for at least one electronic database, including planned limits, such that it could be repeated                                                                                    | 7-9    |

|                                    |     |                                                                                                                                                                                                                                                  |           |
|------------------------------------|-----|--------------------------------------------------------------------------------------------------------------------------------------------------------------------------------------------------------------------------------------------------|-----------|
| Study records:                     |     |                                                                                                                                                                                                                                                  |           |
| Data management                    | 11a | Describe the mechanism(s) that will be used to manage records and data throughout the review                                                                                                                                                     | 9-10      |
| Selection process                  | 11b | State the process that will be used for selecting studies (such as two independent reviewers) through each phase of the review (that is, screening, eligibility and inclusion in meta-analysis)                                                  | 5-6, 9-10 |
| Data collection process            | 11c | Describe planned method of extracting data from reports (such as piloting forms, done independently, in duplicate), any processes for obtaining and confirming data from investigators                                                           | 10        |
| Data items                         | 12  | List and define all variables for which data will be sought (such as PICO items, funding sources), any pre-planned data assumptions and simplifications                                                                                          | 6-7       |
| Outcomes and prioritization        | 13  | List and define all outcomes for which data will be sought, including prioritization of main and additional outcomes, with rationale                                                                                                             | 6         |
| Risk of bias in individual studies | 14  | Describe anticipated methods for assessing risk of bias of individual studies, including whether this will be done at the outcome or study level, or both; state how this information will be used in data synthesis                             | 10        |
| Data synthesis                     | 15a | Describe criteria under which study data will be quantitatively synthesised                                                                                                                                                                      | 11        |
|                                    | 15b | If data are appropriate for quantitative synthesis, describe planned summary measures, methods of handling data and methods of combining data from studies, including any planned exploration of consistency (such as $I^2$ , Kendall's $\tau$ ) | 11        |
|                                    | 15c | Describe any proposed additional analyses (such as sensitivity or subgroup analyses, meta-regression)                                                                                                                                            | 11        |
|                                    | 15d | If quantitative synthesis is not appropriate, describe the type of summary planned                                                                                                                                                               | 11        |
| Meta-bias(es)                      | 16  | Specify any planned assessment of meta-bias(es) (such as publication bias across studies, selective reporting within studies)                                                                                                                    | 10-11     |
| Confidence in cumulative evidence  | 17  | Describe how the strength of the body of evidence will be assessed (such as GRADE)                                                                                                                                                               | 11        |

**\* It is strongly recommended that this checklist be read in conjunction with the PRISMA-P Explanation and Elaboration (cite when available) for important clarification on the items. Amendments to a review protocol should be tracked and dated. The copyright for PRISMA-P (including checklist) is held by the PRISMA-P Group and is distributed under a Creative Commons Attribution Licence 4.0.**

*From: Shamseer L, Moher D, Clarke M, Ghersi D, Liberati A, Petticrew M, Shekelle P, Stewart L, PRISMA-P Group. Preferred reporting items for systematic review and meta-analysis protocols (PRISMA-P) 2015: elaboration and explanation. BMJ. 2015 Jan 2;349(jan02 1):g7647.*

## Additional file 2: Search strategy for low and middle income countries (LMICs)

|   |                                                                                                                                                                                                                                                                                                                                                                                                                                                                                                                                                                                                                                                                                                                                                                                                                                                                                                                                                                                                                                                                                                                                                                                                                                                                                                                                                                                                                                                                                                                                                                                                                                                                                                                                                                                                                                                                                                                                                                                                                                                                                                                                                                                                                                                                                                                                                                                                                                                                                                                                                                                                       |
|---|-------------------------------------------------------------------------------------------------------------------------------------------------------------------------------------------------------------------------------------------------------------------------------------------------------------------------------------------------------------------------------------------------------------------------------------------------------------------------------------------------------------------------------------------------------------------------------------------------------------------------------------------------------------------------------------------------------------------------------------------------------------------------------------------------------------------------------------------------------------------------------------------------------------------------------------------------------------------------------------------------------------------------------------------------------------------------------------------------------------------------------------------------------------------------------------------------------------------------------------------------------------------------------------------------------------------------------------------------------------------------------------------------------------------------------------------------------------------------------------------------------------------------------------------------------------------------------------------------------------------------------------------------------------------------------------------------------------------------------------------------------------------------------------------------------------------------------------------------------------------------------------------------------------------------------------------------------------------------------------------------------------------------------------------------------------------------------------------------------------------------------------------------------------------------------------------------------------------------------------------------------------------------------------------------------------------------------------------------------------------------------------------------------------------------------------------------------------------------------------------------------------------------------------------------------------------------------------------------------|
| 1 | <p>"developing country"[tw] OR "developing countries"[tw] OR "developing nation"[tw] OR "developing nations"[tw] OR "developing population"[tw] OR "developing populations"[tw] OR "developing world"[tw] OR "less developed country"[tw] OR "less developed countries"[tw] OR "less developed nation"[tw] OR "less developed nations"[tw] OR "less developed population"[tw] OR "less developed populations"[tw] OR "less developed world"[tw] OR "lesser developed country"[tw] OR "lesser developed countries"[tw] OR "lesser developed nation"[tw] OR "lesser developed nations"[tw] OR "lesser developed population"[tw] OR "lesser developed populations"[tw] OR "lesser developed world"[tw] OR "under developed country"[tw] OR "under developed countries"[tw] OR "under developed nation"[tw] OR "under developed nations"[tw] OR "under developed population"[tw] OR "under developed populations"[tw] OR "under developed world"[tw] OR "underdeveloped country"[tw] OR "underdeveloped countries"[tw] OR "underdeveloped nation"[tw] OR "underdeveloped nations"[tw] OR "underdeveloped population"[tw] OR "underdeveloped populations"[tw] OR "underdeveloped world"[tw] OR "middle income country"[tw] OR "middle income countries"[tw] OR "middle income nation"[tw] OR "middle income nations"[tw] OR "middle income population"[tw] OR "middle income populations"[tw] OR "low income country"[tw] OR "low income countries"[tw] OR "low income nation"[tw] OR "low income nations"[tw] OR "low income population"[tw] OR "low income populations"[tw] OR "lower income country"[tw] OR "lower income countries"[tw] OR "lower income nation"[tw] OR "lower income nations"[tw] OR "lower income population"[tw] OR "lower income populations"[tw] OR "underserved country"[tw] OR "underserved countries"[tw] OR "underserved nation"[tw] OR "underserved nations"[tw] OR "underserved population"[tw] OR "underserved populations"[tw] OR "underserved world"[tw] OR "under served country"[tw] OR "under served countries"[tw] OR "under served nation"[tw] OR "under served nations"[tw] OR "under served population"[tw] OR "under served populations"[tw] OR "under served world"[tw] OR "deprived country"[tw] OR "deprived countries"[tw] OR "deprived nation"[tw] OR "deprived nations"[tw] OR "deprived population"[tw] OR "deprived populations"[tw] OR "deprived world"[tw] OR "poor country"[tw] OR "poor countries"[tw] OR "poor nation"[tw] OR "poor nations"[tw] OR "poor population"[tw] OR "poor populations"[tw] OR "poor world"[tw] OR "poorer country"[tw]</p> |
|---|-------------------------------------------------------------------------------------------------------------------------------------------------------------------------------------------------------------------------------------------------------------------------------------------------------------------------------------------------------------------------------------------------------------------------------------------------------------------------------------------------------------------------------------------------------------------------------------------------------------------------------------------------------------------------------------------------------------------------------------------------------------------------------------------------------------------------------------------------------------------------------------------------------------------------------------------------------------------------------------------------------------------------------------------------------------------------------------------------------------------------------------------------------------------------------------------------------------------------------------------------------------------------------------------------------------------------------------------------------------------------------------------------------------------------------------------------------------------------------------------------------------------------------------------------------------------------------------------------------------------------------------------------------------------------------------------------------------------------------------------------------------------------------------------------------------------------------------------------------------------------------------------------------------------------------------------------------------------------------------------------------------------------------------------------------------------------------------------------------------------------------------------------------------------------------------------------------------------------------------------------------------------------------------------------------------------------------------------------------------------------------------------------------------------------------------------------------------------------------------------------------------------------------------------------------------------------------------------------------|

|   |                                                                                                                                                                                                                                                                                                                                                                                                                                                                                                                                                                                                                                                                                                                                                                                                                                                                                                                                                                                                                                                                                                                                                                                                                                                                                                                                                                                                                                                        |
|---|--------------------------------------------------------------------------------------------------------------------------------------------------------------------------------------------------------------------------------------------------------------------------------------------------------------------------------------------------------------------------------------------------------------------------------------------------------------------------------------------------------------------------------------------------------------------------------------------------------------------------------------------------------------------------------------------------------------------------------------------------------------------------------------------------------------------------------------------------------------------------------------------------------------------------------------------------------------------------------------------------------------------------------------------------------------------------------------------------------------------------------------------------------------------------------------------------------------------------------------------------------------------------------------------------------------------------------------------------------------------------------------------------------------------------------------------------------|
|   | <p>OR "poorer countries"[tw] OR "poorer nation"[tw] OR "poorer nations"[tw] OR "poorer population"[tw] OR "poorer populations"[tw] OR "poorer world"[tw] OR "developing economy"[tw] OR "developing economies"[tw] OR "less developed economy"[tw] OR "less developed economies"[tw] OR "lesser developed economy"[tw] OR "lesser developed economies"[tw] OR "under developed economy"[tw] OR "under developed economies"[tw] OR "underdeveloped economy"[tw] OR "underdeveloped economies"[tw] OR "middle income economy"[tw] OR "middle income economies"[tw] OR "low income economy"[tw] OR "low income economies"[tw] OR "lower income economy"[tw] OR "lower income economies"[tw] OR "low gdp"[tw] OR "low gnp"[tw] OR "low gross domestic"[tw] OR "low gross national"[tw] OR "lower gdp"[tw] OR "lower gnp"[tw] OR "lower gross domestic"[tw] OR "lower gross national"[tw] OR lmic[tw] OR lmics[tw] OR "third world"[tw] OR "lami country"[tw] OR "lami countries"[tw] OR "transitional country"[tw] OR "transitional countries"[tw]</p>                                                                                                                                                                                                                                                                                                                                                                                                     |
| 2 | <p>Africa[tw] OR Asia[tw] OR Caribbean[tw] OR West Indies[tw] OR South America[tw] OR Latin America[tw] OR Central America[tw] OR Afghanistan[tw] OR Angola[tw] OR Armenia[tw] OR Armenian[tw] OR Bangladesh[tw] OR Benin[tw] OR Byelarus[tw] OR Byelorussian[tw] OR Belorussian[tw] OR Belorussia[tw] OR Bhutan[tw] OR Bolivia[tw] OR Hercegovina[tw] OR Brasil[tw] OR Burkina Faso[tw] OR Burkina Fasso[tw] OR Upper Volta[tw] OR Burundi[tw] OR Urundi[tw] OR Cambodia[tw] OR Khmer Republic[tw] OR Kampuchea[tw] OR Cameroon[tw] OR Cameroons[tw] OR Cameron[tw] OR Camerons[tw] OR Cape Verde[tw] OR Central African Republic[tw] OR Chad[tw] OR Comoros[tw] OR Comoro Islands[tw] OR Comores[tw] OR Mayotte[tw] OR Congo[tw] OR Zaire[tw] OR Cote d'Ivoire[tw] OR Ivory Coast[tw] OR Czechoslovakia[tw] OR Slovakia[tw] OR Djibouti[tw] OR French Somaliland[tw] OR East Timor[tw] OR East Timur[tw] OR Timor Leste[tw] OR Egypt[tw] OR El Salvador[tw] OR Eritrea[tw] OR Ethiopia[tw] OR Gambia[tw] OR Gaza[tw] OR Georgia Republic[tw] OR Georgian Republic[tw] OR Ghana[tw] OR Gold Coast[tw] OR Guatemala[tw] OR Guinea[tw] OR Guiana[tw] OR Haiti[tw] OR Honduras[tw] OR India[tw] OR Indonesia[tw] OR Isle of Man[tw] OR Jordan[tw] OR Kazakh[tw] OR Kenya[tw] OR Kiribati[tw] OR Kosovo[tw] OR Kyrgyzstan[tw] OR Kirghizia[tw] OR Kyrgyz Republic[tw] OR Kirghiz[tw] OR Kirgizstan[tw] OR "Lao PDR"[tw] OR Laos[tw] OR Lesotho[tw] OR</p> |

|   |                                                                                                                                                                                                                                                                                                                                                                                                                                                                                                                                                                                                                                                                                                                                                                                                                                                                                                                                                                                                                                                                                                                                                                                                                                                                                                                                                                                                                                                                  |
|---|------------------------------------------------------------------------------------------------------------------------------------------------------------------------------------------------------------------------------------------------------------------------------------------------------------------------------------------------------------------------------------------------------------------------------------------------------------------------------------------------------------------------------------------------------------------------------------------------------------------------------------------------------------------------------------------------------------------------------------------------------------------------------------------------------------------------------------------------------------------------------------------------------------------------------------------------------------------------------------------------------------------------------------------------------------------------------------------------------------------------------------------------------------------------------------------------------------------------------------------------------------------------------------------------------------------------------------------------------------------------------------------------------------------------------------------------------------------|
|   | Basutoland[tw] OR Liberia[tw]                                                                                                                                                                                                                                                                                                                                                                                                                                                                                                                                                                                                                                                                                                                                                                                                                                                                                                                                                                                                                                                                                                                                                                                                                                                                                                                                                                                                                                    |
| 3 | <p>Madagascar[tw] OR Malagasy Republic[tw] OR Malaya[tw] OR Malay[tw] OR Sabah[tw] OR Sarawak[tw] OR Malawi[tw] OR Nyasaland[tw] OR Mali[tw] OR Mauritania[tw] OR OR Agalega Islands[tw] OR Micronesia[tw] OR Middle East[tw] OR Moldova[tw] OR Moldova[tw] OR Moldovian[tw] OR Mongolia[tw] OR Morocco[tw] OR Ifni[tw] OR Mozambique[tw] OR Myanmar[tw] OR Myanma[tw] OR Burma[tw] OR Nepal[tw] OR Nicaragua[tw] OR Niger[tw] OR Nigeria[tw] OR Muscat[tw] OR Pakistan[tw] OR Palestine[tw] OR Philippines[tw] OR Philipines[tw] OR Phillipines[tw] OR Phillippines[tw] OR Rumania[tw] OR Roumania[tw] OR Russia[tw]OR Rwanda[tw] OR Ruanda[tw] OR Saint Kitts[tw] OR St Kitts[tw] OR Nevis[tw] OR Saint Vincent[tw] OR St Vincent[tw] OR Grenadines[tw] OR Navigator Island[tw] OR Navigator Islands[tw] OR Sao Tome[tw] OR Senegal[tw] OR Sierra Leone[tw] OR Sri Lanka[tw] OR Ceylon[tw] OR Solomon Islands[tw] OR Somalia[tw] OR Sudan[tw] OR Surinam[tw] OR Swaziland[tw] OR Syria[tw] OR Tajikistan[tw] OR Tadzhhikistan[tw] OR Tadjikistan[tw] OR Tadzhhik[tw] OR Tanzania[tw] OR Togo[tw] OR Togolese Republic[tw] OR Tunisia[tw] OR Turkmen[tw] OR Uganda[tw] OR Ukraine[tw] OR USSR[tw] OR Soviet Union[tw] OR Union of Soviet Socialist Republics[tw] OR Uzbekistan[tw] OR Uzbek OR Vanuatu[tw] OR New Hebrides[tw] OR Vietnam[tw] OR Viet Nam[tw] OR West Bank[tw] OR Yemen[tw] OR Yugoslavia[tw] OR Zambia[tw] OR Zimbabwe[tw] OR Rhodesia[tw]</p> |
| 4 | <p>Developing Countries[Mesh:noexp] OR Africa[Mesh:noexp] OR Africa, Northern[Mesh:noexp] OR Africa South of the Sahara[Mesh:noexp] OR Africa, Central[Mesh:noexp] OR Africa, Eastern[Mesh:noexp] OR Africa, Southern[Mesh:noexp] OR Africa, Western[Mesh:noexp] OR Asia[Mesh:noexp] OR Asia, Central[Mesh:noexp] OR Asia, Southeastern[Mesh:noexp] OR Asia, Western[Mesh:noexp] OR Caribbean Region[Mesh:noexp] OR West Indies[Mesh:noexp] OR South America[Mesh:noexp] OR Latin America[Mesh:noexp] OR Central America[Mesh:noexp] OR Afghanistan[Mesh:noexp] OR Angola[Mesh:noexp] OR Armenia[Mesh:noexp] OR Bangladesh[Mesh:noexp] OR Benin[Mesh:noexp] OR Byelarus[Mesh:noexp] OR</p>                                                                                                                                                                                                                                                                                                                                                                                                                                                                                                                                                                                                                                                                                                                                                                       |

|   |                                                                                                                                                                                                                                                                                                                                                                                                                                                                                                                                                                                                                                                                                                                                                                                                                                                                                                                                                                                                                                                                                                                                                                                                                                                                                                                                                                                                                                                                                                                                                                                                                                                                                                                                                                                                                                                                                                                                                                                                                                                                                                                                                                                                                                                                                                                                                                                                                                                   |
|---|---------------------------------------------------------------------------------------------------------------------------------------------------------------------------------------------------------------------------------------------------------------------------------------------------------------------------------------------------------------------------------------------------------------------------------------------------------------------------------------------------------------------------------------------------------------------------------------------------------------------------------------------------------------------------------------------------------------------------------------------------------------------------------------------------------------------------------------------------------------------------------------------------------------------------------------------------------------------------------------------------------------------------------------------------------------------------------------------------------------------------------------------------------------------------------------------------------------------------------------------------------------------------------------------------------------------------------------------------------------------------------------------------------------------------------------------------------------------------------------------------------------------------------------------------------------------------------------------------------------------------------------------------------------------------------------------------------------------------------------------------------------------------------------------------------------------------------------------------------------------------------------------------------------------------------------------------------------------------------------------------------------------------------------------------------------------------------------------------------------------------------------------------------------------------------------------------------------------------------------------------------------------------------------------------------------------------------------------------------------------------------------------------------------------------------------------------|
|   | <p>Bhutan[Mesh:noexp] OR Bolivia[Mesh:noexp] OR Burkina Faso[Mesh:noexp] OR<br/>         Burundi[Mesh:noexp] OR Cambodia[Mesh:noexp] OR Cameroon[Mesh:noexp] OR Cape<br/>         Verde[Mesh:noexp] OR Central African Republic[Mesh:noexp] OR Chad[Mesh:noexp] OR<br/>         Comoros[Mesh:noexp] OR Congo[Mesh:noexp] OR Cote d'Ivoire[Mesh:noexp]<br/>         Czechoslovakia[Mesh:noexp] OR Slovakia[Mesh:noexp] OR Djibouti[Mesh:noexp] OR<br/>         "Democratic Republic of the Congo"[Mesh:noexp] OR East Timor[Mesh:noexp] OR<br/>         Egypt[Mesh:noexp] OR El Salvador[Mesh:noexp] OR Eritrea[Mesh:noexp] OR<br/>         Ethiopia[Mesh:noexp] OR Gambia[Mesh:noexp] OR "Georgia (Republic)"[Mesh:noexp] OR<br/>         Ghana[Mesh:noexp] OR Guatemala[Mesh:noexp] OR Guinea[Mesh:noexp] OR Guinea-<br/>         Bissau[Mesh:noexp] OR Haiti[Mesh:noexp] OR Honduras[Mesh:noexp] OR<br/>         India[Mesh:noexp] OR Indonesia[Mesh:noexp] OR Jordan[Mesh:noexp] OR<br/>         Kenya[Mesh:noexp] OR Kosovo[Mesh:noexp] OR Kyrgyzstan[Mesh:noexp] OR<br/>         Laos[Mesh:noexp] OR Lesotho[Mesh:noexp] OR Liberia[Mesh:noexp] OR<br/>         Madagascar[Mesh:noexp] OR Malawi[Mesh:noexp] OR Mali[Mesh:noexp] OR<br/>         Mauritania[Mesh:noexp] OR Micronesia[Mesh:noexp] OR Middle East[Mesh:noexp] OR<br/>         Moldova[Mesh:noexp] OR Mongolia[Mesh:noexp] OR Morocco[Mesh:noexp] OR<br/>         Mozambique[Mesh:noexp] OR Myanmar[Mesh:noexp] OR Nepal[Mesh:noexp] OR<br/>         Nicaragua[Mesh:noexp] OR Niger[Mesh:noexp] OR Nigeria[Mesh:noexp] OR<br/>         Pakistan[Mesh:noexp] OR Papua New Guinea[Mesh:noexp] OR Philippines[Mesh:noexp] OR<br/>         Russia[Mesh:noexp] OR "Russia (Pre-1917)"[Mesh:noexp] OR Rwanda[Mesh:noexp] OR<br/>         "Saint Kitts and Nevis"[Mesh:noexp] OR Senegal[Mesh:noexp] OR Sierra<br/>         Leone[Mesh:noexp] OR Sri Lanka[Mesh:noexp] OR Somalia[Mesh:noexp] OR<br/>         Sudan[Mesh:noexp] OR Swaziland[Mesh:noexp] OR Syria[Mesh:noexp] OR<br/>         Tajikistan[Mesh:noexp] OR Tanzania[Mesh:noexp] OR Togo[Mesh:noexp] OR<br/>         Tunisia[Mesh:noexp] OR Uganda[Mesh:noexp] OR Ukraine[Mesh:noexp] OR<br/>         USSR[Mesh:noexp] OR Uzbekistan[Mesh:noexp] OR Vanuatu[Mesh:noexp] OR<br/>         Vietnam[Mesh:noexp] OR Yemen[Mesh:noexp] OR Yugoslavia[Mesh:noexp] OR<br/>         Zambia[Mesh:noexp] OR Zimbabwe[Mesh:noexp]</p> |
| 5 | OR/1-4                                                                                                                                                                                                                                                                                                                                                                                                                                                                                                                                                                                                                                                                                                                                                                                                                                                                                                                                                                                                                                                                                                                                                                                                                                                                                                                                                                                                                                                                                                                                                                                                                                                                                                                                                                                                                                                                                                                                                                                                                                                                                                                                                                                                                                                                                                                                                                                                                                            |

# BMJ Open

## Non pharmacological interventions for prevention of hypertension in low and middle income countries: Protocol for a systematic review and meta-analysis

|                                 |                                                                                                                                                                                                                                                                                                                                                                                                                                                                                                                                                                                                                                                                                                                                                                                                                                                                                                                                                                                                                                                                                                                                     |
|---------------------------------|-------------------------------------------------------------------------------------------------------------------------------------------------------------------------------------------------------------------------------------------------------------------------------------------------------------------------------------------------------------------------------------------------------------------------------------------------------------------------------------------------------------------------------------------------------------------------------------------------------------------------------------------------------------------------------------------------------------------------------------------------------------------------------------------------------------------------------------------------------------------------------------------------------------------------------------------------------------------------------------------------------------------------------------------------------------------------------------------------------------------------------------|
| Journal:                        | <i>BMJ Open</i>                                                                                                                                                                                                                                                                                                                                                                                                                                                                                                                                                                                                                                                                                                                                                                                                                                                                                                                                                                                                                                                                                                                     |
| Manuscript ID                   | bmjopen-2017-020724.R1                                                                                                                                                                                                                                                                                                                                                                                                                                                                                                                                                                                                                                                                                                                                                                                                                                                                                                                                                                                                                                                                                                              |
| Article Type:                   | Protocol                                                                                                                                                                                                                                                                                                                                                                                                                                                                                                                                                                                                                                                                                                                                                                                                                                                                                                                                                                                                                                                                                                                            |
| Date Submitted by the Author:   | 22-Feb-2018                                                                                                                                                                                                                                                                                                                                                                                                                                                                                                                                                                                                                                                                                                                                                                                                                                                                                                                                                                                                                                                                                                                         |
| Complete List of Authors:       | Rahman, K M Saif Ur; International Centre for Diarrhoeal Disease Research, Health Systems and Population Studies Division (HSPSD)<br>Hasan, Md.; International Centre for Diarrhoeal Disease Research, Health Systems and Population Studies Division (HSPSD)<br>Hossain, Shahed; International Centre for Diarrhoeal Disease Research, Health Systems and Population Studies Division (HSPSD)<br>Shafique, Sohana; International Centre for Diarrhoeal Disease Research, Health Systems and Population Studies Division (HSPSD)<br>Khalequzzaman, Md. ; Bangabandhu Sheikh Mujib Medical University, Department of Public Health & Informatics<br>Haseen, Fariha; Bangabandhu Sheikh Mujib Medical University, Department of Public Health and Informatics<br>Rahman, Aminur ; International Centre for Diarrhoeal Disease Research, Health Systems and Population Studies Division (HSPSD)<br>Anwar, Iqbal; International Centre for Diarrhoeal Disease Research, Health Systems and population studies division (HSPSD)<br>Islam, Syed; Bangabandhu Sheikh Mujib Medical University, Department of Public Health and Informatics |
| <b>Primary Subject Heading</b>: | Cardiovascular medicine                                                                                                                                                                                                                                                                                                                                                                                                                                                                                                                                                                                                                                                                                                                                                                                                                                                                                                                                                                                                                                                                                                             |
| Secondary Subject Heading:      | Public health                                                                                                                                                                                                                                                                                                                                                                                                                                                                                                                                                                                                                                                                                                                                                                                                                                                                                                                                                                                                                                                                                                                       |
| Keywords:                       | Intervention, Prevention, Hypertension < CARDIOLOGY, Non pharmacological, Systematic review, LMICs                                                                                                                                                                                                                                                                                                                                                                                                                                                                                                                                                                                                                                                                                                                                                                                                                                                                                                                                                                                                                                  |
|                                 |                                                                                                                                                                                                                                                                                                                                                                                                                                                                                                                                                                                                                                                                                                                                                                                                                                                                                                                                                                                                                                                                                                                                     |

SCHOLARONE™  
Manuscripts



**Title:** Non pharmacological interventions for prevention of hypertension in low and middle income countries: Protocol for a systematic review and meta-analysis

**Authors' name:** K M Saif-Ur-Rahman<sup>1,3</sup>, Md Hasan<sup>1,3</sup>, Shahed Hossain<sup>1</sup>, Sohana Shafique<sup>1</sup>, Md. Khalequzzaman<sup>2,3</sup>, Fariha Haseen<sup>2,3</sup>, Aminur Rahman<sup>1</sup>, Iqbal Anwar<sup>1</sup>, Shariful Islam<sup>2,3</sup>

**Affiliations:** 1 Health Systems and Population Studies Division, icddr,b, Dhaka, Bangladesh  
2 Department of Public Health and Informatics, Bangabandhu Sheikh Mujib Medical University (BSMMU), Dhaka, Bangladesh  
3 Systematic Review Centre (SRC), Bangabandhu Sheikh Mujib Medical University (BSMMU), Dhaka, Bangladesh

**Mail addresses:** [su.rahman@icddr.org](mailto:su.rahman@icddr.org) ; [hasan.md@icddr.org](mailto:hasan.md@icddr.org) ; [shahed@icddr.org](mailto:shahed@icddr.org) ; [sohana.shafique@icddr.org](mailto:sohana.shafique@icddr.org) ; [romenraihan@yahoo.com](mailto:romenraihan@yahoo.com) ; [farhaseen3@gmail.com](mailto:farhaseen3@gmail.com) ; [draminur@icddr.org](mailto:draminur@icddr.org) ; [iqbal@icddr.org](mailto:iqbal@icddr.org) ; [islam.sharif@gmail.com](mailto:islam.sharif@gmail.com)

**Corresponding author:** K M Saif-Ur-Rahman, icddr,b ,  
Universal Health Coverage, Health Systems and Population Studies  
Division (HSPSD)  
68, Shahid Tajuddin Ahmed Sarani, Mohakali, Dhaka 1212,  
Bangladesh  
email: [su.rahman@icddr.org](mailto:su.rahman@icddr.org)  
Phone: +8801717043239

**Word Count:** 2030

1  
2  
3 **32 ABSTRACT:**  
4  
5 **33**

6  
7 **34 Introduction:** In recent times, hypertension has become one of the major public health problems  
8  
9 **35** in both developed and developing world and is responsible for death due to heart diseases and  
10  
11 **36** stroke. Increasing trend in prevalence of hypertension in low and middle income countries  
12  
13 **37** (LMICs) and it's catastrophic consequences have made the phenomena important to continue to  
14  
15 **38** investigate interventions for prevention and control. Different dietary and life style related  
16  
17 **39** approaches have been recommended for prevention of hypertension. Aim of this proposed  
18  
19 **40** review is to explore the available non pharmacological interventions tried for prevention of  
20  
21 **41** hypertension in LMICs.

22  
23 **42 Methods and analysis:** Eight electronic databases will be searched covering period between  
24  
25 **43** 1990 and 2016 to identify relevant studies and screened by two independent reviewers. Searched  
26  
27 **44** articles will be included for full text extraction applying definitive inclusion and exclusion  
28  
29 **45** criteria. Appropriate critical appraisal tools including Cochrane Handbook for Systematic  
30  
31 **46** Reviews of Interventions will be used to assess the risk of bias. Disagreement between two  
32  
33 **47** reviewers will be resolved by a third reviewer. Narrative synthesis of the findings will be  
34  
35 **48** provided along with summaries of intervention effect. A meta-analysis will be undertaken using  
36  
37 **49** the random-effect model where applicable. Heterogeneity between the studies will be assessed,  
38  
39 **50** and sensitivity analysis will be conducted based on study quality.

40  
41 **51 Ethics and dissemination:** This systematic review protocol is registered with International  
42  
43 **52** Prospective Register of Systematic Reviews (PROSPERO) CRD42017055423. Approval from  
44  
45 **53** institutional review board has been taken for this review. Findings will be summarized in a single  
46  
47 **54** manuscript.

48  
49 **55** This review is an attempt to explore the available non-pharmacological approaches for  
50  
51 **56** prevention of hypertension in LMICs. Findings from the review will highlight effective non  
52  
53 **57** pharmacological measures for prevention of hypertension to guide policy for future strategies.  
54  
55 **58**

56  
57 **59**

58  
59 **60**

60  
61 **61**

61  
62 **62**

62  
63 **63**

## 63 STRENGTH AND LIMITATIONS

- 64 • This systematic review protocol follows strong methods of Cochrane systematic review.
- 65 • Only Randomized Controlled Trials (RCTs) are included in this systematic review.
- 66 • This systematic review protocol describes the assessment of risk of bias (ROB) following  
67 Cochrane guideline for assessing risk of bias and critical appraisal of included articles  
68 using the Critical Appraisal Skills Program (CASP) checklist for RCTs.
- 69 • This systematic review includes articles written only in English and thus there is  
70 possibility of missing information from articles written in other languages.

71  
72 **Key Words:** Intervention, Prevention, Hypertension, Non pharmacological, Systematic review,  
73 LMICs

## 94 INTRODUCTION

95  
96 In recent times, hypertension has become one of the major public health problems in both  
97 developed and developing world. Global prevalence of hypertension (defined as systolic and/or  
98 diastolic blood pressure equal to or above 140/90 mmHg [1]) among adults aged 18 years and  
99 over was around 22% in 2014 [2] which is projected to be increased to 29% by the year 2025 [3].  
100 Hypertension is the cause of death due to heart disease (45%) and stroke (51%) in majority of  
101 cases [4]. Recent epidemiological transition is reflected with increased prevalence of  
102 hypertension in LMICs and a decreasing trend in the developed world [5]. In 2010, the global  
103 prevalence of adult hypertensive was 31.1%, with a prevalence of 28.5% in high-income  
104 countries and 31.5% LMICs. Between 2000 and 2010, the age-standardized prevalence of  
105 hypertension increased by 7.7% in LMICs and decreased by 2.6% in high income countries[6].  
106 In 2015, more than half of the global disability adjusted life years (DALYs) were related to  
107 systolic blood pressure in countries like China, India, Russia, Indonesia, and the United States  
108 [7]. A recent systematic review describes that the pooled estimate of the overall prevalence of  
109 hypertension in LMICs was 32.3% [8]. One systematic review depicts that overall prevalence for  
110 hypertension in India was 29.8% with significant difference between rural and urban areas [9].  
111 Similar results have been reported from population based studies in Bangladesh where age-  
112 standardized prevalence of pre-hypertension and hypertension were 27.1% and 24.4%  
113 respectively [10]. In Pakistan, the overall prevalence of hypertension was 26% among the low  
114 income community with an increased proportion among the males [11]. Increasing prevalence of  
115 hypertension leads to higher rates of morbidity and mortality directly or indirectly, which has  
116 made the phenomena an important public health issue in particularly in LMICs. Hence, it is  
117 important and justified to continue investigating interventions proven effective to prevent  
118 hypertension. There are certain dietary and life style related approaches for prevention of  
119 hypertension [12]. Specific interventions such as supplementations with increased calcium intake  
120 has been proved effective to reduce both systolic and diastolic blood pressure in normotensive  
121 people, suggesting a role in the prevention of hypertension [13]. Other than general exercise,  
122 *yoga* [14] and *tai chai* [15] could also successfully prevent hypertension. Some medications have  
123 also been tested through randomized controlled trials among pre-hypertensive population to  
124 prevent high prevalence of hypertension [16].

1  
2  
3 125 Prevention of hypertension can minimize the fatal morbid conditions and consequences of  
4 126 cardiovascular events. Changes in life style variables, along with other non-pharmacological  
5 127 interventions may play an important role to halt increasing trend in the prevalence of  
6 128 hypertension in LMICs where there is a scarcity of programs for prevention and control of high  
7 129 blood pressure [17]. Prevention of onset of hypertension with such intervention is evident and  
8 130 will contribute to reduce the premature mortality and disability related to hypertension in this  
9 131 region. Despite different therapeutic approaches, an effective preventive strategy can help policy  
10 132 makers to formulate specific context-specific strategies for prevention and control of the  
11 133 increasing burden of hypertension in LMICs.  
12  
13  
14  
15  
16  
17  
18  
19  
20  
21  
22  
23

### 24 135 **OBJECTIVE:**

25 136  
26 137 This review is an attempt to explore the available non pharmacological approaches including  
27 138 lifestyle modification, exercise, dietary supplementation and restriction etc for prevention of  
28 139 hypertension in LMICs to inform policy for effective measures for prevention of hypertension.  
29  
30

### 31 141 **METHODS:**

### 32 142 33 143 **PROTOCOL**

34 144 This is a protocol for systematic review and meta analysis which has been developed addressing  
35 145 the Preferred Reporting Items for Systematic Reviews and Meta-Analysis Protocols (PRISMA-  
36 146 P) guidelines for reporting systematic reviews evaluating health care interventions[18 19]. A  
37 147 PRISMA-P checklist for this protocol is attached (Additional file 1).  
38  
39  
40  
41  
42  
43  
44

### 45 149 **ELIGIBILITY CRITERIA**

46 150 Studies will be selected according to the criteria outlined below.  
47  
48  
49

### 50 152 **PARTICIPANTS**

51 153 Included studies will be on normotensive (Systolic BP 120-139 mm Hg and diastolic BP 80-89  
52 154 mm Hg)[20] adults of LMIC's as defined by the World Bank[21].  
53  
54  
55  
56  
57  
58  
59  
60

1  
2  
3 156  
4 157  
5 158  
6

## **INTERVENTIONS**

7 159 Studies assessing the effect of non pharmacological interventions for the prevention of  
8 hypertension among normotensive adult population will be considered for inclusion.  
9 160 Interventions will include life style modification, dietary restriction, non pharmacological diet  
10 161 supplementation, exercise and any combination of the above mentioned interventions.  
11 162  
12 163

13  
14 163

## **COMPARATORS**

15 164  
16 165 A comparison will be made with non pharmacological interventions versus no intervention.  
17 166  
18 167

## **OUTCOMES**

19 168 Primary outcomes

20 169 Hypertension, Systolic and diastolic blood pressure

21 170 Secondary outcomes

22 171 Any adverse event; Cardiovascular events; Myocardial infarction; Stroke; Kidney stone  
23 172 formation; Iron deficiency anaemia; mortality; Sudden death  
24 173

## **SETTING**

25 174  
26 175 There will be no restrictions by study-setting such as, hospital or community. Any non  
27 176 pharmacological intervention for hypertension in any settings will be included in the review.  
28 177

## **STUDY DESIGNS**

29 178  
30 179 We will include randomized controlled trials (RCTs) (including cluster RCTs) to assess the  
31 180 beneficial effect of interventions. Non-randomized studies including pretest-posttest controlled  
32 181 studies, prospective comparative cohort studies, case-control studies and cross-sectional studies  
33 182 will be excluded.  
34 183

## **EXCLUSION CRITERIA**

35 184  
36 185 Studies conducted outside LMICs will be excluded. Intervention provided on hypertensive  
37 186 people, population below 18 years of age, pregnant women and people with other diseases will  
38 187 be excluded. We will exclude pharmacological intervention and combination of pharmacological  
39

188 intervention with non pharmacological intervention. Systematic reviews, reviews, ongoing trials,  
 189 trial protocols, and studies other than RCTs will be excluded. Letter, editorials and conference  
 190 papers will be excluded. Articles written in language other than English will be excluded as well.

191

## 192 INFORMATION SOURCES

193 Following electronic bibliographic databases will be searched systematically using a  
 194 comprehensive search strategy. The databases are: MEDLINE through Pubmed, Embase, The  
 195 Cochrane Library (Cochrane Central Register of Controlled Trials (CENTRAL), Web of  
 196 Science, Scopus, Clinical Trials. gov, EBSCO and WICTRP (International Clinical Trials  
 197 Registry Platform). The search strategy will include terms relating to or describing the  
 198 population, intervention and outcome. The terms will be combined with the Cochrane  
 199 MEDLINE filter for controlled trials of interventions.

200

## 201 SEARCH STRATEGY

202 A comprehensive search strategy will be developed for MEDLINE. The search terms will be  
 203 adapted for other bibliographic databases in combination with database-specific filters for  
 204 controlled trials, where these are available. Table 1 demonstrates the key search terms for  
 205 population, intervention, comparison and outcome.

206

207 **Table 1: Key terms used for developing comprehensive search strategy**

208

| Population (P)                | Intervention (I)                                                                                                                                                       | Outcome (O)                      | Filter                                     |
|-------------------------------|------------------------------------------------------------------------------------------------------------------------------------------------------------------------|----------------------------------|--------------------------------------------|
| LMICs<br>"Developing country" | Exercise<br>"Physical activity"<br>"Weight loss"<br>"Sodium restriction"<br>"Dietary potassium<br>"Calcium supplementation"<br>"Fish oil supplementation"<br>Lifestyle | Hypertension<br>"Blood pressure" | "Randomized<br>controlled<br>trials" (RCT) |

209  
210 Only English language literature will be searched. Studies published between January 1990 and  
211 the date the searches are run will be sought. The searches will be re-run just before the final  
212 analyses and further studies retrieved for inclusion. Comprehensive search strategy prepared for  
213 Pubmed is provided in Table 2.

214

215 **Table 2: Search strategy: PubMed format**

|    |                                                                                                                                                                                                                                                                                                                                                                                                                                                                                                                                          |
|----|------------------------------------------------------------------------------------------------------------------------------------------------------------------------------------------------------------------------------------------------------------------------------------------------------------------------------------------------------------------------------------------------------------------------------------------------------------------------------------------------------------------------------------------|
| 1  | LMIC's*                                                                                                                                                                                                                                                                                                                                                                                                                                                                                                                                  |
| 2  | Exercise [MeSH Terms] OR "Physical Exercise" [tw] OR "Physical activity" [tw]                                                                                                                                                                                                                                                                                                                                                                                                                                                            |
| 3  | ( "Weight Loss/classification"[Mesh] OR "Weight Loss/complications"[Mesh] OR "Weight Loss/diagnosis"[Mesh] OR "Weight Loss/diet therapy"[Mesh] OR "Weight Loss/drug effects"[Mesh] OR "Weight Loss/drug therapy"[Mesh] OR "Weight Loss/epidemiology"[Mesh] OR "Weight Loss/etiology"[Mesh] OR "Weight Loss/genetics"[Mesh] OR "Weight Loss/metabolism"[Mesh] OR "Weight Loss/mortality"[Mesh] OR "Weight Loss/prevention and control"[Mesh] OR "Weight Loss/rehabilitation"[Mesh] OR "Weight Loss/statistics and numerical data"[Mesh] ) |
| 4  | Exercise therapy [mesh] OR Exercise test [mesh] OR Exercise Movement Techniques [mesh]                                                                                                                                                                                                                                                                                                                                                                                                                                                   |
| 5  | "weight loss" [tw] OR weight reduction program [MeSH Terms] OR "weight reduction" [tw] OR losing weight [tw]                                                                                                                                                                                                                                                                                                                                                                                                                             |
| 6  | "Sodium restriction" [tw] OR Dietary potassium [MeSH Terms] OR "Dietary potassium" [tw] OR "Calcium supplementation" OR "Fish oil supplementation" [tw]                                                                                                                                                                                                                                                                                                                                                                                  |
| 7  | Salt Restrict*[tiab] OR low Sodium*[tiab] OR low salt*[tiab] OR Potassium, Diet* [tw]                                                                                                                                                                                                                                                                                                                                                                                                                                                    |
| 8  | Magnesium [tw] OR Calcium [tw]                                                                                                                                                                                                                                                                                                                                                                                                                                                                                                           |
| 9  | "Salt intake" [tw] OR Sodium Chloride, Dietary [MeSH Term] OR "Dietary salt" [tw] OR "Dietary Salt intake" [tw] OR "Dietary Salt restriction" [tw]                                                                                                                                                                                                                                                                                                                                                                                       |
| 10 | Garlic [MeSH Terms] OR Garlic [tw]                                                                                                                                                                                                                                                                                                                                                                                                                                                                                                       |
| 11 | Smoking Cessation [MeSH Term] OR "Smoking Cessation" [tw] OR Tobacco Use Cessation*[tw]                                                                                                                                                                                                                                                                                                                                                                                                                                                  |
| 12 | decreased [tw] AND ("alcohol drinking"[MeSH Terms] OR ("alcohol"[tw] AND "drinking"[tw]) OR "alcohol drinking"[tw] OR ("alcohol"[tw] AND "intake"[tw]) OR "alcohol intake"[tw])                                                                                                                                                                                                                                                                                                                                                          |
| 13 | Alcohol Drink*[tw] OR Alcohol consum*[tw] OR Drinking Alcohol*[tw] OR Alcoholi*[tw] OR non pharmacol*[tw]                                                                                                                                                                                                                                                                                                                                                                                                                                |
| 14 | life style*[tw] OR lifestyl*[tw] OR diet therapy [mesh] OR fat Restrict*[tiab] OR low fat*[tiab] OR Carbohydrate Restrict*[tiab] OR low carb*[tiab] OR Caloric Restrict*[tw] OR Food, Formulated [tw] OR Formulated Food*[tw] OR diet [tw] OR dietary [tw]                                                                                                                                                                                                                                                                               |
| 15 | Disease Management*[tw] OR kinesiotherap*[tw] OR Physical Endurance [mesh] OR Anaerobic*[tiab] OR aerobic*[tiab] OR Resistance Training*[tiab] OR Motor activit*[tw] OR Physical Activit*[tiab] OR Locomotor Activit*[tiab]                                                                                                                                                                                                                                                                                                              |
| 16 | Social support*[tw] OR Social Network*[tiab] OR relaxation therap* [tw] OR tai-ji [tw] OR yoga [tw]                                                                                                                                                                                                                                                                                                                                                                                                                                      |



---

 17 **OR/ 2-16**


---

 18 "Hypertension/classification"[Majr] OR "Hypertension/complications"[Majr] OR  
 19 "Hypertension/diet therapy"[Majr] OR "Hypertension/drug effects"[Majr] OR "Blood  
 20 Pressure/classification"[Mesh] OR "Blood Pressure/complications"[Mesh] OR "Blood  
 21 Pressure/diagnosis"[Mesh] OR "Blood Pressure/drug effects"[Mesh] OR "Blood  
 22 Pressure/etiology"[Mesh] OR "Blood Pressure/genetics"[Mesh] OR "Blood  
 23 Pressure/metabolism"[Mesh] OR "Blood Pressure/methods"[Mesh] OR "Blood  
 24 Pressure/statistics and numerical data"[Mesh] OR "Blood Pressure/therapy"[Mesh]  
 25 "Hypertension/drug therapy"[Majr] OR "Hypertension/epidemiology"[Majr] OR  
 26 "Hypertension/etiology"[Majr] OR "Hypertension/genetics"[Majr] OR  
 27 "Hypertension/metabolism"[Majr] OR "Hypertension/mortality"[Majr]

 19 "Hypertension/prevention and control"[Majr] OR "Hypertension/rehabilitation"[Majr] OR  
 20 "Hypertension/therapy"[Majr] OR "Blood Pressure/classification"[Mesh] OR "Blood  
 21 Pressure/complications"[Mesh] OR "Blood Pressure/diagnosis"[Mesh] OR "Blood  
 22 Pressure/drug effects"[Mesh] OR "high blood pressure" [tw] OR "Blood pressure" [tw] OR  
 23 bloodpressure [tw] OR ("Systole/drug effects"[Majr] OR "Systole/etiology"[Majr] OR  
 24 "Systole/genetics"[Majr]) OR "Blood Pressure/etiology"[Mesh] OR "Blood  
 25 Pressure/genetics"[Mesh] OR "Blood Pressure/metabolism"[Mesh] OR "Blood  
 26 Pressure/methods"[Mesh] OR "Blood Pressure/statistics and numerical data"[Mesh] OR  
 27 "Blood Pressure/therapy"[Mesh] OR "high blood pressure" [tw] OR "Blood pressure" [tw]  
 28 OR bloodpressure [tw] OR ("Systole/drug effects"[Majr] OR "Systole/etiology"[Majr] OR  
 29 "Systole/genetics"[Majr]) OR ("Diastole/drug effects"[Mesh] OR "Diastole/etiology"[Mesh]  
 30 OR "Diastole/genetics"[Mesh]) OR ((arterial OR diastolic OR systolic) AND pressure) OR  
 31 Hypertension [tw] OR "Blood Pressure" [tw]

 20 **OR/18-19**


---

 21 Randomized controlled trial [tiab] OR controlled clinical trial [tiab] OR randomized [tiab] OR  
 22 placebo [tiab] OR randomization [tiab] OR randomization [tiab] OR drug therapy [tiab] OR  
 23 randomly [tiab] OR trial [tiab] OR groups [tiab]

 22 **#1 AND #17 AND #20 AND #21**


---

23 animals [mh] NOT humans [mh]

 24 **#22 NOT #23**


---

25 Restrict #24 to year=1990 and up to date

26 Restrict #25 to English language

27 Restrict #26 to Age 18+ years

216

217 Search terms and search strategy for LMICs are provided in Additional file 2.

218

219

220

221

1  
2  
3 **222 STUDY RECORDS**  
4

5 223

6  
7 **224 DATA MANAGEMENT**

8 225 Reference management software EndNote will be used to organize articles retrieved from the  
9 226 comprehensive literature search. Search results from different electronic databases will be  
10 227 combined and uploaded in a single EndNote library. Duplicate articles will be checked and  
11  
12 228 removed.

13  
14  
15 229 Remaining literature search results will be uploaded to EPPI reviewer, a software with facilities  
16  
17 230 of citation screening and supports collaboration between reviewers. Citation abstracts and full  
18  
19 231 text articles will be uploaded to the EPPI reviewer software.

20 232

21  
22 **233 SELECTION PROCESS**  
23

24 234 Screening of title and abstract of retrieved articles will be conducted by two reviewers  
25  
26 235 independently to identify studies eligible for inclusion. The screening will be done using the  
27  
28 236 EPPI reviewer software. After inclusion for full text review, eligible studies will be assessed  
29  
30 237 independently for final inclusion. Any disagreement between reviewers over the decision of  
31  
32 238 inclusion will be resolved through discussion with a third reviewer. Reasons for exclusion will  
33  
34 239 be recorded. Multiple publications from same study will be reported. Summaries of included and  
35  
36 240 excluded studies will be demonstrated using the Preferred Reporting Items for Systematic  
37  
38 241 Reviews and Meta-analyses (PRISMA) flow-diagram[22].

39 242

40 **243 DATA EXTRACTION**

41 244 Rigorous quality assessment will be undertaken applying the Critical Appraisal Skills Program  
42  
43 245 (CASP) checklist for RCTs. Data on study population, study setting, baseline characteristics of  
44  
45 246 study participants, study methodology, intervention details for prevention of hypertension,  
46  
47 247 enrollment and attrition rates, outcomes measurement, and information for assessing of the risk  
48  
49 248 of bias will be extracted independently by two reviewers using a standardized form.

50 249

51 **250 RISK OF BIAS ASSESSMENT**

52  
53 251 Two reviewers will assess the risk of bias independently following guidelines from Cochrane  
54  
55 252 assessment of risk of bias for randomized controlled trials [23]. According to the guideline, six  
56  
57

1  
2  
3 253 specific domains of bias are considered including selection bias, performance bias, detection  
4 254 bias, attrition bias, reporting bias and other bias. Reviewers will provide their judgments as per  
5 255 guideline and make comments on whether studies are at high risk of bias. For assessing selection  
6 256 bias, ‘allocation concealment’ and ‘random sequence generation’ will be considered.  
7 257 Performance and detection bias will be explored through assessment of blinding at the level of  
8 258 participants, implementers and outcome assessors, while lost to follow up will be considered to  
9 259 assess attrition bias. Selective reporting and presentation of outcome will also be considered.  
10 260 There will be search for any other potential bias. Any disagreements between the reviewers  
11 261 while assessing the risk of bias will be resolved by discussion and if necessary, a third reviewer  
12 262 will opine to make a consensus.  
13  
14  
15  
16  
17  
18  
19  
20  
21

22 263  
23 264 **ASSESSMENT OF THE BODY OF EVIDENCE—THE GRADE APPROACH**  
24 265 We will use the ‘Grades of Recommendation, Assessment, Development and Evaluation  
25 266 (GRADE)’ approach for assessing the quality of evidence [24] which focuses on five domains  
26 267 including study limitations, imprecision, indirectness, effect consistency and publication bias.  
27 268 Considering these domains, the quality of the body of evidence will be assessed for specific  
28 269 outcomes. Assessing as high risk of bias, indirect and imprecise evidence will lead to downgrade  
29 270 the evidence by one or two level.  
30  
31  
32  
33  
34  
35

36 271  
37 272 **STRATEGY FOR DATA SYNTHESIS**  
38 273 A narrative synthesis of the findings from the included studies will be provided focusing the  
39 274 characteristics of target population, type of intervention and outcome. A summary of effect-size  
40 275 for individual studies will be presented by estimating risk ratios and odds ratio for dichotomous  
41 276 outcomes (developing hypertension) or standardized mean differences for continuous outcomes  
42 277 (systolic and diastolic blood pressure) respectively. Studies with the same interventions for  
43 278 prevention of hypertension, comparators and outcome measure, will be pooled using the random  
44 279 effect model meta-analysis methods with 95% confidence intervals and two-tailed *p* values will  
45 280 be calculated for each outcome. Standard deviations will be adjusted for the design effect where  
46 281 the effects of clustering have not been taken into account. Both the Chi-squared test and the I-  
47 282 squared statistic will be considered for measuring the heterogeneity of effect measures. I-squared  
48 283 value greater than 50% will be indicative of substantial heterogeneity. We will conduct  
49  
50  
51  
52  
53  
54  
55  
56  
57  
58  
59  
60

1  
2  
3 284 sensitivity analyses based on study quality where applicable. Potential publication bias will also  
4  
5 285 be assessed for individual studies through generating a funnel plot using review manager  
6  
7 286 software (RevMan).  
8  
9 287

## 10 288 **PATIENT AND PUBLIC INVOLVEMENT**

11  
12 289 This is a protocol for systematic review and no patients are directly involved in the process. The  
13  
14 290 review question and outcome measures are developed for the overall betterment of people who  
15  
16 291 are at risk of developing hypertension.  
17  
18 292

## 19 293 **PUBLICATION PLAN**

20  
21 294 This systematic review protocol is registered with International Prospective Register of  
22  
23 295 Systematic Reviews (PROSPERO) CRD42017055423. Findings will be summarized in a single  
24  
25 296 manuscript.  
26  
27 297

## 28 298 **TIMELINE**

29 299 Review start date: 1<sup>st</sup> March 2017  
30  
31 300 Review finishing date: 28 February 2018  
32  
33 301 Reporting date: 28 February 2018  
34  
35 302

## 36 303 **ABBREVIATIONS**

37  
38 304 BSMMU: Bangabandhu Sheikh Mujib Medical University  
39  
40 305 DALYs: Disability adjusted life years  
41  
42 306 GRADE: Grades of Recommendation, Assessment, Development and Evaluation  
43  
44 307 LMICs: Low and middle income countries  
45  
46 308 MESH: Medical subject headings  
47  
48 309 PRISMA-P: Preferred reporting items for systematic reviews and meta-analysis protocols  
49  
50 310 PROSPERO: International Prospective Register of Systematic Reviews  
51  
52 311 RCT: Randomized Controlled Trial  
53  
54 312 WHO: World Health Organization  
55  
56 313  
57  
58 314

1  
2  
3 315 **DECLARATIONS**  
4

5 316

6  
7 317 **FUNDING**

8 318 There is no external funding for this systematic review. This review has been conducted by the  
9  
10 319 Systematic Review Centre (SRC) of Department of Public Health and Informatics at  
11  
12 320 Bangabandhu Sheikh Mujib Medical University (BSMMU), Bangladesh which has been  
13  
14 321 established with the support of SHARE (Strengthening Health Applying Research Evidence)  
15 322 project of icddr,b funded by the European Union (Grant Contract No DCI-SANTE/2014/342-  
16 323 479). icddr,b acknowledges with gratitude the commitment of European Union (EU) to its  
17 324 research efforts. icddr,b is also grateful to the Governments of Bangladesh, Canada, Sweden and  
18  
19 325 the UK for providing core/unrestricted support.  
20  
21

22 326

23  
24 327 **AVAILABILITY OF DATA AND MATERIALS**

25 328 The datasets generated and/or analyzed during the current review shall be available from the  
26  
27 329 corresponding author on reasonable request.  
28

29 330

30  
31 331 **AUTHORS' CONTRIBUTIONS**

32 332 IA, SI, SH, SR and MH conceptualized the review in consultation with the co-reviewers. SR  
33  
34 333 wrote the first draft of this protocol with substantial inputs from all authors. SR and MH will  
35  
36 334 contribute to the literature search. Screening, collection and analysis of data for all the included  
37  
38 335 interventions will be conducted by SR and MH with close consultation from SH, SS, SI, AR,  
39 336 MK, FH and IA. All authors will provide input, review and finalize the paper before  
40  
41 337 dissemination. The corresponding author is the guarantor of this review. All authors read and  
42  
43 338 approved the final manuscript.  
44

45 339

46 340 **COMPETING INTERESTS**

47  
48 341 The authors declare that they have no competing interests.  
49

50 342

51 343 **ETHICS AND DISSEMINATION**

52  
53 344 Approval for conducting this systematic review has been taken from the Institutional Review  
54  
55 345 Board (IRB) of Bangabandhu Sheikh Mujib Medical University (BSMMU). No additional  
56  
57

346 formal ethical assessment and no informed consent are required. Findings of the systematic  
347 review will be published in international peer reviewed journal for dissemination.

348

349

## 350 **AMENDMENTS**

351 Any updates or amendments to this protocol will be described in a table including the date of  
352 each amendment, description of the change and rationale for the change. The PROSPERO  
353 register will remain updated with the protocol and amendments.

354

355

## 356 Reference

357

- 358 1. James PA, Oparil S, Carter BL, et al. 2014 evidence-based guideline for the management of  
359 high blood pressure in adults: Report from the panel members appointed to the eighth  
360 joint national committee (jnc 8). *Jama* 2014;**311**(5):507-20 doi:  
361 10.1001/jama.2013.284427[published Online First: Epub Date]].
- 362 2. World Health Organization W. Global status report on noncommunicable diseases 2014. 2014
- 363 3. Kearney PM, Whelton M, Reynolds K, et al. Global burden of hypertension: analysis of  
364 worldwide data. *The lancet* 2005;**365**(9455):217-23
- 365 4. (WHO) WHO. A global brief on hypertension: silent killer, global public health crisis. World  
366 2016
- 367 5. Kearney PM, Whelton M, Reynolds K, et al. Worldwide prevalence of hypertension: a  
368 systematic review. *Journal of Hypertension* 2004;**22**(1):11-19
- 369 6. Mills KT, Bundy JD, Kelly TN, et al. Global Disparities of Hypertension Prevalence and  
370 ControlClinical Perspective. *Circulation* 2016;**134**(6):441-50
- 371 7. Forouzanfar MH, Liu P, Roth GA, et al. Global Burden of Hypertension and Systolic Blood  
372 Pressure of at Least 110 to 115 mm Hg, 1990-2015. *Jama* 2017;**317**(2):165-82 doi:  
373 10.1001/jama.2016.19043[published Online First: Epub Date]].
- 374 8. Sarki AM, Nduka CU, Stranges S, et al. Prevalence of Hypertension in Low- and Middle-  
375 Income Countries: A Systematic Review and Meta-Analysis. *Medicine*  
376 2015;**94**(50):e1959 doi: 10.1097/md.0000000000001959[published Online First: Epub  
377 Date]].
- 378 9. Anchala R, Kannuri NK, Pant H, et al. Hypertension in India: a systematic review and meta-  
379 analysis of prevalence, awareness, and control of hypertension. *Journal of hypertension*  
380 2014;**32**(6):1170-77
- 381 10. Rahman MM, Gilmour S, Akter S, et al. Prevalence and control of hypertension in  
382 Bangladesh: a multilevel analysis of a nationwide population-based survey. *J Hypertens*  
383 2015;**33**(3):465-72; discussion 72 doi: 10.1097/hjh.0000000000000421[published Online  
384 First: Epub Date]].



11. Safdar S, Omair A, Faisal U, et al. Prevalence of hypertension in a low income settlement of Karachi, Pakistan. *Prevalence* 2004
12. Appel LJ, Brands MW, Daniels SR, et al. Dietary approaches to prevent and treat hypertension: a scientific statement from the American Heart Association. *Hypertension* (Dallas, Tex : 1979) 2006;**47**(2):296-308 doi: 10.1161/01.hyp.0000202568.01167.b6[published Online First: Epub Date]].
13. Cormick G, Ciapponi A, Cafferata ML, et al. Calcium supplementation for prevention of primary hypertension. *The Cochrane database of systematic reviews* 2015(6):Cd010037 doi: 10.1002/14651858.CD010037.pub2[published Online First: Epub Date]].
14. Wang J, Xiong X, Liu W. Yoga for essential hypertension: a systematic review. *PloS one* 2013;**8**(10):e76357
15. Yeh GY, Wang C, Wayne PM, et al. The effect of tai chi exercise on blood pressure: a systematic review. *Preventive cardiology* 2008;**11**(2):82-89
16. Fuchs SC, Poli-de-Figueiredo CE, Figueiredo Neto JA, et al. Effectiveness of Chlorthalidone Plus Amiloride for the Prevention of Hypertension: The PREVER-Prevention Randomized Clinical Trial. *Journal of the American Heart Association* 2016;**5**(12) doi: 10.1161/jaha.116.004248[published Online First: Epub Date]].
17. Lemogoum D. Challenge for hypertension prevention and control worldwide: the time for action. *The Journal of Clinical Hypertension* 2014;**16**(8):554-56
18. Moher D, Shamseer L, Clarke M, et al. Preferred reporting items for systematic review and meta-analysis protocols (PRISMA-P) 2015 statement. *Systematic reviews* 2015;**4**(1):1
19. Shamseer L, Moher D, Clarke M, et al. Preferred reporting items for systematic review and meta-analysis protocols (PRISMA-P) 2015: elaboration and explanation. *Bmj* 2015;**349**:g7647
20. Gabb GM, Mangoni A, Anderson CS, et al. Guideline for the diagnosis and management of hypertension in adults—2016. *mortality* 2016;**3**:4
21. Bank W. "Country Groups," *Data and Statistics*, The World Bank. 2007
22. Moher D, Liberati A, Tetzlaff J, et al. Preferred reporting items for systematic reviews and meta-analyses: the PRISMA statement. *PLoS med* 2009;**6**(7):e1000097
23. Higgins J GS. *Cochrane Handbook for Systematic Reviews of Interventions*, Version 5.1.0. . The Cochrane Collaboration 2011
24. Schunemann H BJ, Guyatt G, Oxman AD. *GRADE Handbook: handbook for grading the quality of evidence and the strength of recommendations using the GRADE approach* . 2013

419

**PRISMA-P (Preferred Reporting Items for Systematic review and Meta-Analysis Protocols) 2015 checklist: recommended items to address in a systematic review protocol\***

| Section and topic                 | Item No | Checklist item                                                                                                                                                                                                                | Page # |
|-----------------------------------|---------|-------------------------------------------------------------------------------------------------------------------------------------------------------------------------------------------------------------------------------|--------|
| <b>ADMINISTRATIVE INFORMATION</b> |         |                                                                                                                                                                                                                               |        |
| Title:                            |         |                                                                                                                                                                                                                               |        |
| Identification                    | 1a      | Identify the report as a protocol of a systematic review                                                                                                                                                                      | 1      |
| Update                            | 1b      | If the protocol is for an update of a previous systematic review, identify as such                                                                                                                                            | N/A    |
| Registration                      | 2       | If registered, provide the name of the registry (such as PROSPERO) and registration number                                                                                                                                    | 12     |
| Authors:                          |         |                                                                                                                                                                                                                               |        |
| Contact                           | 3a      | Provide name, institutional affiliation, e-mail address of all protocol authors; provide physical mailing address of corresponding author                                                                                     | 1      |
| Contributions                     | 3b      | Describe contributions of protocol authors and identify the guarantor of the review                                                                                                                                           | 13     |
| Amendments                        | 4       | If the protocol represents an amendment of a previously completed or published protocol, identify as such and list changes; otherwise, state plan for documenting important protocol amendments                               | N/A    |
| Support:                          |         |                                                                                                                                                                                                                               |        |
| Sources                           | 5a      | Indicate sources of financial or other support for the review                                                                                                                                                                 | 12     |
| Sponsor                           | 5b      | Provide name for the review funder and/or sponsor                                                                                                                                                                             | 12     |
| Role of sponsor or funder         | 5c      | Describe roles of funder(s), sponsor(s), and/or institution(s), if any, in developing the protocol                                                                                                                            | 12     |
| <b>INTRODUCTION</b>               |         |                                                                                                                                                                                                                               |        |
| Rationale                         | 6       | Describe the rationale for the review in the context of what is already known                                                                                                                                                 | 4-5    |
| Objectives                        | 7       | Provide an explicit statement of the question(s) the review will address with reference to participants, interventions, comparators, and outcomes (PICO)                                                                      | 5-6    |
| <b>METHODS</b>                    |         |                                                                                                                                                                                                                               |        |
| Eligibility criteria              | 8       | Specify the study characteristics (such as PICO, study design, setting, time frame) and report characteristics (such as years considered, language, publication status) to be used as criteria for eligibility for the review | 6-7    |
| Information sources               | 9       | Describe all intended information sources (such as electronic databases, contact with study authors, trial registers or other grey literature sources) with planned dates of coverage                                         | 6-7    |
| Search strategy                   | 10      | Present draft of search strategy to be used for at least one electronic database, including planned limits, such that it could be repeated                                                                                    | 7-9    |



|                                    |     |                                                                                                                                                                                                                                                  |           |
|------------------------------------|-----|--------------------------------------------------------------------------------------------------------------------------------------------------------------------------------------------------------------------------------------------------|-----------|
| Study records:                     |     |                                                                                                                                                                                                                                                  |           |
| Data management                    | 11a | Describe the mechanism(s) that will be used to manage records and data throughout the review                                                                                                                                                     | 9-10      |
| Selection process                  | 11b | State the process that will be used for selecting studies (such as two independent reviewers) through each phase of the review (that is, screening, eligibility and inclusion in meta-analysis)                                                  | 5-6, 9-10 |
| Data collection process            | 11c | Describe planned method of extracting data from reports (such as piloting forms, done independently, in duplicate), any processes for obtaining and confirming data from investigators                                                           | 10        |
| Data items                         | 12  | List and define all variables for which data will be sought (such as PICO items, funding sources), any pre-planned data assumptions and simplifications                                                                                          | 6-7       |
| Outcomes and prioritization        | 13  | List and define all outcomes for which data will be sought, including prioritization of main and additional outcomes, with rationale                                                                                                             | 6         |
| Risk of bias in individual studies | 14  | Describe anticipated methods for assessing risk of bias of individual studies, including whether this will be done at the outcome or study level, or both; state how this information will be used in data synthesis                             | 10        |
| Data synthesis                     | 15a | Describe criteria under which study data will be quantitatively synthesised                                                                                                                                                                      | 11        |
|                                    | 15b | If data are appropriate for quantitative synthesis, describe planned summary measures, methods of handling data and methods of combining data from studies, including any planned exploration of consistency (such as $I^2$ , Kendall's $\tau$ ) | 11        |
|                                    | 15c | Describe any proposed additional analyses (such as sensitivity or subgroup analyses, meta-regression)                                                                                                                                            | 11        |
|                                    | 15d | If quantitative synthesis is not appropriate, describe the type of summary planned                                                                                                                                                               | 11        |
| Meta-bias(es)                      | 16  | Specify any planned assessment of meta-bias(es) (such as publication bias across studies, selective reporting within studies)                                                                                                                    | 10-11     |
| Confidence in cumulative evidence  | 17  | Describe how the strength of the body of evidence will be assessed (such as GRADE)                                                                                                                                                               | 11        |

**\* It is strongly recommended that this checklist be read in conjunction with the PRISMA-P Explanation and Elaboration (cite when available) for important clarification on the items. Amendments to a review protocol should be tracked and dated. The copyright for PRISMA-P (including checklist) is held by the PRISMA-P Group and is distributed under a Creative Commons Attribution Licence 4.0.**

*From: Shamseer L, Moher D, Clarke M, Ghersi D, Liberati A, Petticrew M, Shekelle P, Stewart L, PRISMA-P Group. Preferred reporting items for systematic review and meta-analysis protocols (PRISMA-P) 2015: elaboration and explanation. BMJ. 2015 Jan 2;349(jan02 1):g7647.*

**Additional file 2: Search strategy for low and middle income countries (LMICs)**

|                                                                                                                                                                                                                                                                                                                                                             |                                                                                                                                                                                                                                                                                                                                                                                                                                                                                                                                                                                                                                                                                                                                                                                                                                                                                                                                                                                                                                                                                                                                                                                                                                                                                                                                                                                                                                                                                                                                                                                                                                                                                                                                                                                                                                                                                                                                                                                                                                                                                                                                                                                                                                                                                                                                                                                                                                                                                                                                                                                                       |
|-------------------------------------------------------------------------------------------------------------------------------------------------------------------------------------------------------------------------------------------------------------------------------------------------------------------------------------------------------------|-------------------------------------------------------------------------------------------------------------------------------------------------------------------------------------------------------------------------------------------------------------------------------------------------------------------------------------------------------------------------------------------------------------------------------------------------------------------------------------------------------------------------------------------------------------------------------------------------------------------------------------------------------------------------------------------------------------------------------------------------------------------------------------------------------------------------------------------------------------------------------------------------------------------------------------------------------------------------------------------------------------------------------------------------------------------------------------------------------------------------------------------------------------------------------------------------------------------------------------------------------------------------------------------------------------------------------------------------------------------------------------------------------------------------------------------------------------------------------------------------------------------------------------------------------------------------------------------------------------------------------------------------------------------------------------------------------------------------------------------------------------------------------------------------------------------------------------------------------------------------------------------------------------------------------------------------------------------------------------------------------------------------------------------------------------------------------------------------------------------------------------------------------------------------------------------------------------------------------------------------------------------------------------------------------------------------------------------------------------------------------------------------------------------------------------------------------------------------------------------------------------------------------------------------------------------------------------------------------|
| 1<br>2<br>3<br>4<br>5<br>6<br>7<br>8<br>9<br>10<br>11<br>12<br>13<br>14<br>15<br>16<br>17<br>18<br>19<br>20<br>21<br>22<br>23<br>24<br>25<br>26<br>27<br>28<br>29<br>30<br>31<br>32<br>33<br>34<br>35<br>36<br>37<br>38<br>39<br>40<br>41<br>42<br>43<br>44<br>45<br>46<br>47<br>48<br>49<br>50<br>51<br>52<br>53<br>54<br>55<br>56<br>57<br>58<br>59<br>60 | <p>"developing country"[tw] OR "developing countries"[tw] OR "developing nation"[tw] OR "developing nations"[tw] OR "developing population"[tw] OR "developing populations"[tw] OR "developing world"[tw] OR "less developed country"[tw] OR "less developed countries"[tw] OR "less developed nation"[tw] OR "less developed nations"[tw] OR "less developed population"[tw] OR "less developed populations"[tw] OR "less developed world"[tw] OR "lesser developed country"[tw] OR "lesser developed countries"[tw] OR "lesser developed nation"[tw] OR "lesser developed nations"[tw] OR "lesser developed population"[tw] OR "lesser developed populations"[tw] OR "lesser developed world"[tw] OR "under developed country"[tw] OR "under developed countries"[tw] OR "under developed nation"[tw] OR "under developed nations"[tw] OR "under developed population"[tw] OR "under developed populations"[tw] OR "under developed world"[tw] OR "underdeveloped country"[tw] OR "underdeveloped countries"[tw] OR "underdeveloped nation"[tw] OR "underdeveloped nations"[tw] OR "underdeveloped population"[tw] OR "underdeveloped populations"[tw] OR "underdeveloped world"[tw] OR "middle income country"[tw] OR "middle income countries"[tw] OR "middle income nation"[tw] OR "middle income nations"[tw] OR "middle income population"[tw] OR "middle income populations"[tw] OR "low income country"[tw] OR "low income countries"[tw] OR "low income nation"[tw] OR "low income nations"[tw] OR "low income population"[tw] OR "low income populations"[tw] OR "lower income country"[tw] OR "lower income countries"[tw] OR "lower income nation"[tw] OR "lower income nations"[tw] OR "lower income population"[tw] OR "lower income populations"[tw] OR "underserved country"[tw] OR "underserved countries"[tw] OR "underserved nation"[tw] OR "underserved nations"[tw] OR "underserved population"[tw] OR "underserved populations"[tw] OR "underserved world"[tw] OR "under served country"[tw] OR "under served countries"[tw] OR "under served nation"[tw] OR "under served nations"[tw] OR "under served population"[tw] OR "under served populations"[tw] OR "under served world"[tw] OR "deprived country"[tw] OR "deprived countries"[tw] OR "deprived nation"[tw] OR "deprived nations"[tw] OR "deprived population"[tw] OR "deprived populations"[tw] OR "deprived world"[tw] OR "poor country"[tw] OR "poor countries"[tw] OR "poor nation"[tw] OR "poor nations"[tw] OR "poor population"[tw] OR "poor populations"[tw] OR "poor world"[tw] OR "poorer country"[tw]</p> |
|-------------------------------------------------------------------------------------------------------------------------------------------------------------------------------------------------------------------------------------------------------------------------------------------------------------------------------------------------------------|-------------------------------------------------------------------------------------------------------------------------------------------------------------------------------------------------------------------------------------------------------------------------------------------------------------------------------------------------------------------------------------------------------------------------------------------------------------------------------------------------------------------------------------------------------------------------------------------------------------------------------------------------------------------------------------------------------------------------------------------------------------------------------------------------------------------------------------------------------------------------------------------------------------------------------------------------------------------------------------------------------------------------------------------------------------------------------------------------------------------------------------------------------------------------------------------------------------------------------------------------------------------------------------------------------------------------------------------------------------------------------------------------------------------------------------------------------------------------------------------------------------------------------------------------------------------------------------------------------------------------------------------------------------------------------------------------------------------------------------------------------------------------------------------------------------------------------------------------------------------------------------------------------------------------------------------------------------------------------------------------------------------------------------------------------------------------------------------------------------------------------------------------------------------------------------------------------------------------------------------------------------------------------------------------------------------------------------------------------------------------------------------------------------------------------------------------------------------------------------------------------------------------------------------------------------------------------------------------------|

|   |                                                                                                                                                                                                                                                                                                                                                                                                                                                                                                                                                                                                                                                                                                                                                                                                                                                                                                                                                                                                                                                                                                                                                                                                                                                                                                                                                                                                                                                        |
|---|--------------------------------------------------------------------------------------------------------------------------------------------------------------------------------------------------------------------------------------------------------------------------------------------------------------------------------------------------------------------------------------------------------------------------------------------------------------------------------------------------------------------------------------------------------------------------------------------------------------------------------------------------------------------------------------------------------------------------------------------------------------------------------------------------------------------------------------------------------------------------------------------------------------------------------------------------------------------------------------------------------------------------------------------------------------------------------------------------------------------------------------------------------------------------------------------------------------------------------------------------------------------------------------------------------------------------------------------------------------------------------------------------------------------------------------------------------|
|   | <p>OR "poorer countries"[tw] OR "poorer nation"[tw] OR "poorer nations"[tw] OR "poorer population"[tw] OR "poorer populations"[tw] OR "poorer world"[tw] OR "developing economy"[tw] OR "developing economies"[tw] OR "less developed economy"[tw] OR "less developed economies"[tw] OR "lesser developed economy"[tw] OR "lesser developed economies"[tw] OR "under developed economy"[tw] OR "under developed economies"[tw] OR "underdeveloped economy"[tw] OR "underdeveloped economies"[tw] OR "middle income economy"[tw] OR "middle income economies"[tw] OR "low income economy"[tw] OR "low income economies"[tw] OR "lower income economy"[tw] OR "lower income economies"[tw] OR "low gdp"[tw] OR "low gnp"[tw] OR "low gross domestic"[tw] OR "low gross national"[tw] OR "lower gdp"[tw] OR "lower gnp"[tw] OR "lower gross domestic"[tw] OR "lower gross national"[tw] OR lmic[tw] OR lmics[tw] OR "third world"[tw] OR "lami country"[tw] OR "lami countries"[tw] OR "transitional country"[tw] OR "transitional countries"[tw]</p>                                                                                                                                                                                                                                                                                                                                                                                                     |
| 2 | <p>Africa[tw] OR Asia[tw] OR Caribbean[tw] OR West Indies[tw] OR South America[tw] OR Latin America[tw] OR Central America[tw] OR Afghanistan[tw] OR Angola[tw] OR Armenia[tw] OR Armenian[tw] OR Bangladesh[tw] OR Benin[tw] OR Byelarus[tw] OR Byelorussian[tw] OR Belorussian[tw] OR Belorussia[tw] OR Bhutan[tw] OR Bolivia[tw] OR Hercegovina[tw] OR Brasil[tw] OR Burkina Faso[tw] OR Burkina Fasso[tw] OR Upper Volta[tw] OR Burundi[tw] OR Urundi[tw] OR Cambodia[tw] OR Khmer Republic[tw] OR Kampuchea[tw] OR Cameroon[tw] OR Cameroons[tw] OR Cameron[tw] OR Camerons[tw] OR Cape Verde[tw] OR Central African Republic[tw] OR Chad[tw] OR Comoros[tw] OR Comoro Islands[tw] OR Comores[tw] OR Mayotte[tw] OR Congo[tw] OR Zaire[tw] OR Cote d'Ivoire[tw] OR Ivory Coast[tw] OR Czechoslovakia[tw] OR Slovakia[tw] OR Djibouti[tw] OR French Somaliland[tw] OR East Timor[tw] OR East Timur[tw] OR Timor Leste[tw] OR Egypt[tw] OR El Salvador[tw] OR Eritrea[tw] OR Ethiopia[tw] OR Gambia[tw] OR Gaza[tw] OR Georgia Republic[tw] OR Georgian Republic[tw] OR Ghana[tw] OR Gold Coast[tw] OR Guatemala[tw] OR Guinea[tw] OR Guiana[tw] OR Haiti[tw] OR Honduras[tw] OR India[tw] OR Indonesia[tw] OR Isle of Man[tw] OR Jordan[tw] OR Kazakh[tw] OR Kenya[tw] OR Kiribati[tw] OR Kosovo[tw] OR Kyrgyzstan[tw] OR Kirghizia[tw] OR Kyrgyz Republic[tw] OR Kirghiz[tw] OR Kirgizstan[tw] OR "Lao PDR"[tw] OR Laos[tw] OR Lesotho[tw] OR</p> |

|   |                                                                                                                                                                                                                                                                                                                                                                                                                                                                                                                                                                                                                                                                                                                                                                                                                                                                                                                                                                                                                                                                                                                                                                                                                                                                                                                                                                                                                                                               |
|---|---------------------------------------------------------------------------------------------------------------------------------------------------------------------------------------------------------------------------------------------------------------------------------------------------------------------------------------------------------------------------------------------------------------------------------------------------------------------------------------------------------------------------------------------------------------------------------------------------------------------------------------------------------------------------------------------------------------------------------------------------------------------------------------------------------------------------------------------------------------------------------------------------------------------------------------------------------------------------------------------------------------------------------------------------------------------------------------------------------------------------------------------------------------------------------------------------------------------------------------------------------------------------------------------------------------------------------------------------------------------------------------------------------------------------------------------------------------|
|   | Basutoland[tw] OR Liberia[tw]                                                                                                                                                                                                                                                                                                                                                                                                                                                                                                                                                                                                                                                                                                                                                                                                                                                                                                                                                                                                                                                                                                                                                                                                                                                                                                                                                                                                                                 |
| 3 | <p>Madagascar[tw] OR Malagasy Republic[tw] OR Malaya[tw] OR Malay[tw] OR Sabah[tw] OR Sarawak[tw] OR Malawi[tw] OR Nyasaland[tw] OR Mali[tw] OR Mauritania[tw] OR OR Agalega Islands[tw] OR Micronesia[tw] OR Middle East[tw] OR Moldova[tw] OR Moldova[tw] OR Moldovan[tw] OR Mongolia[tw] OR Morocco[tw] OR Ifni[tw] OR Mozambique[tw] OR Myanmar[tw] OR Myanma[tw] OR Burma[tw] OR Nepal[tw] OR Nicaragua[tw] OR Niger[tw] OR Nigeria[tw] OR Muscat[tw] OR Pakistan[tw] OR Palestine[tw] OR Philippines[tw] OR Philipines[tw] OR Phillipines[tw] OR Phillippines[tw] OR Rumania[tw] OR Roumania[tw] OR Russia[tw]OR Rwanda[tw] OR Ruanda[tw] OR Saint Kitts[tw] OR St Kitts[tw] OR Nevis[tw] OR Saint Vincent[tw] OR St Vincent[tw] OR Grenadines[tw] OR Navigator Island[tw] OR Navigator Islands[tw] OR Sao Tome[tw] OR Senegal[tw] OR Sierra Leone[tw] OR Sri Lanka[tw] OR Ceylon[tw] OR Solomon Islands[tw] OR Somalia[tw] OR Sudan[tw] OR Surinam[tw] OR Swaziland[tw] OR Syria[tw] OR Tajikistan[tw] OR Tadzhikistan[tw] OR Tadjikistan[tw] OR Tadzhiq[tw] OR Tanzania[tw] OR Togo[tw] OR Togolese Republic[tw] OR Tunisia[tw] OR Turkmen[tw] OR Uganda[tw] OR Ukraine[tw] OR USSR[tw] OR Soviet Union[tw] OR Union of Soviet Socialist Republics[tw] OR Uzbekistan[tw] OR Uzbek OR Vanuatu[tw] OR New Hebrides[tw] OR Vietnam[tw] OR Viet Nam[tw] OR West Bank[tw] OR Yemen[tw] OR Yugoslavia[tw] OR Zambia[tw] OR Zimbabwe[tw] OR Rhodesia[tw]</p> |
| 4 | <p>Developing Countries[Mesh:noexp] OR Africa[Mesh:noexp] OR Africa, Northern[Mesh:noexp] OR Africa South of the Sahara[Mesh:noexp] OR Africa, Central[Mesh:noexp] OR Africa, Eastern[Mesh:noexp] OR Africa, Southern[Mesh:noexp] OR Africa, Western[Mesh:noexp] OR Asia[Mesh:noexp] OR Asia, Central[Mesh:noexp] OR Asia, Southeastern[Mesh:noexp] OR Asia, Western[Mesh:noexp] OR Caribbean Region[Mesh:noexp] OR West Indies[Mesh:noexp] OR South America[Mesh:noexp] OR Latin America[Mesh:noexp] OR Central America[Mesh:noexp] OR Afghanistan[Mesh:noexp] OR Angola[Mesh:noexp] OR Armenia[Mesh:noexp] OR Bangladesh[Mesh:noexp] OR Benin[Mesh:noexp] OR Byelarus[Mesh:noexp] OR</p>                                                                                                                                                                                                                                                                                                                                                                                                                                                                                                                                                                                                                                                                                                                                                                    |

|   |                                                                                                                                                                                                                                                                                                                                                                                                                                                                                                                                                                                                                                                                                                                                                                                                                                                                                                                                                                                                                                                                                                                                                                                                                                                                                                                                                                                                                                                                                                                                                                                                                                                                                                                                                                                                                                                                                                                                                                                                                                                                                                                                                                                                                                                                                                                                                                                                                                                   |
|---|---------------------------------------------------------------------------------------------------------------------------------------------------------------------------------------------------------------------------------------------------------------------------------------------------------------------------------------------------------------------------------------------------------------------------------------------------------------------------------------------------------------------------------------------------------------------------------------------------------------------------------------------------------------------------------------------------------------------------------------------------------------------------------------------------------------------------------------------------------------------------------------------------------------------------------------------------------------------------------------------------------------------------------------------------------------------------------------------------------------------------------------------------------------------------------------------------------------------------------------------------------------------------------------------------------------------------------------------------------------------------------------------------------------------------------------------------------------------------------------------------------------------------------------------------------------------------------------------------------------------------------------------------------------------------------------------------------------------------------------------------------------------------------------------------------------------------------------------------------------------------------------------------------------------------------------------------------------------------------------------------------------------------------------------------------------------------------------------------------------------------------------------------------------------------------------------------------------------------------------------------------------------------------------------------------------------------------------------------------------------------------------------------------------------------------------------------|
|   | <p>Bhutan[Mesh:noexp] OR Bolivia[Mesh:noexp] OR Burkina Faso[Mesh:noexp] OR<br/>         Burundi[Mesh:noexp] OR Cambodia[Mesh:noexp] OR Cameroon[Mesh:noexp] OR Cape<br/>         Verde[Mesh:noexp] OR Central African Republic[Mesh:noexp] OR Chad[Mesh:noexp] OR<br/>         Comoros[Mesh:noexp] OR Congo[Mesh:noexp] OR Cote d'Ivoire[Mesh:noexp]<br/>         Czechoslovakia[Mesh:noexp] OR Slovakia[Mesh:noexp] OR Djibouti[Mesh:noexp] OR<br/>         "Democratic Republic of the Congo"[Mesh:noexp] OR East Timor[Mesh:noexp] OR<br/>         Egypt[Mesh:noexp] OR El Salvador[Mesh:noexp] OR Eritrea[Mesh:noexp] OR<br/>         Ethiopia[Mesh:noexp] OR Gambia[Mesh:noexp] OR "Georgia (Republic)"[Mesh:noexp] OR<br/>         Ghana[Mesh:noexp] OR Guatemala[Mesh:noexp] OR Guinea[Mesh:noexp] OR Guinea-<br/>         Bissau[Mesh:noexp] OR Haiti[Mesh:noexp] OR Honduras[Mesh:noexp] OR<br/>         India[Mesh:noexp] OR Indonesia[Mesh:noexp] OR Jordan[Mesh:noexp] OR<br/>         Kenya[Mesh:noexp] OR Kosovo[Mesh:noexp] OR Kyrgyzstan[Mesh:noexp] OR<br/>         Laos[Mesh:noexp] OR Lesotho[Mesh:noexp] OR Liberia[Mesh:noexp] OR<br/>         Madagascar[Mesh:noexp] OR Malawi[Mesh:noexp] OR Mali[Mesh:noexp] OR<br/>         Mauritania[Mesh:noexp] OR Micronesia[Mesh:noexp] OR Middle East[Mesh:noexp] OR<br/>         Moldova[Mesh:noexp] OR Mongolia[Mesh:noexp] OR Morocco[Mesh:noexp] OR<br/>         Mozambique[Mesh:noexp] OR Myanmar[Mesh:noexp] OR Nepal[Mesh:noexp] OR<br/>         Nicaragua[Mesh:noexp] OR Niger[Mesh:noexp] OR Nigeria[Mesh:noexp] OR<br/>         Pakistan[Mesh:noexp] OR Papua New Guinea[Mesh:noexp] OR Philippines[Mesh:noexp] OR<br/>         Russia[Mesh:noexp] OR "Russia (Pre-1917)"[Mesh:noexp] OR Rwanda[Mesh:noexp] OR<br/>         "Saint Kitts and Nevis"[Mesh:noexp] OR Senegal[Mesh:noexp] OR Sierra<br/>         Leone[Mesh:noexp] OR Sri Lanka[Mesh:noexp] OR Somalia[Mesh:noexp] OR<br/>         Sudan[Mesh:noexp] OR Swaziland[Mesh:noexp] OR Syria[Mesh:noexp] OR<br/>         Tajikistan[Mesh:noexp] OR Tanzania[Mesh:noexp] OR Togo[Mesh:noexp] OR<br/>         Tunisia[Mesh:noexp] OR Uganda[Mesh:noexp] OR Ukraine[Mesh:noexp] OR<br/>         USSR[Mesh:noexp] OR Uzbekistan[Mesh:noexp] OR Vanuatu[Mesh:noexp] OR<br/>         Vietnam[Mesh:noexp] OR Yemen[Mesh:noexp] OR Yugoslavia[Mesh:noexp] OR<br/>         Zambia[Mesh:noexp] OR Zimbabwe[Mesh:noexp]</p> |
| 5 | OR/1-4                                                                                                                                                                                                                                                                                                                                                                                                                                                                                                                                                                                                                                                                                                                                                                                                                                                                                                                                                                                                                                                                                                                                                                                                                                                                                                                                                                                                                                                                                                                                                                                                                                                                                                                                                                                                                                                                                                                                                                                                                                                                                                                                                                                                                                                                                                                                                                                                                                            |
